# Supplementary material for: Response surface optimization for cadmium biosorption onto the pre-treated biomass of red algae Digenia simplex as a sustainable indigenous biosorbent
Source: PeerJ. 2025 Aug 4;13:e19776. doi: 10.7717/peerj.19776 (PMC12330821; doi:10.7717/peerj.19776)
Supplement: Supplemental Information 1 [file peerj-13-19776-s001.xlsx]

## Sheet: Sheet1
	ANOVA for Response Surface Reduced Quadratic Model
	Analysis of variance table [Partial sum of squares - Type III]
		Sum of		Mean	F	p-value
	Source	Squares	df	Square	Value	Prob > F
	Model	440.45	6	73.4084	12.4214	0.0011	significant
	A-pH	10.5885	1	10.5885	1.79167	0.2175
	B-metal conc.	36.8812	1	36.8812	6.24063	0.0371
	C-Algal dose	110.966	1	110.966	18.7764	0.0025
	BC	106.781	1	106.781	18.0683	0.0028
	A^2	36.3278	1	36.3278	6.147	0.0382
	C^2	148.505	1	148.505	25.1284	0.0010
	Residual	47.2788	8	5.90985
	Lack of Fit	40.3336	6	6.72227	1.93581	0.3791	not significant
	Pure Error	6.94516	2	3.47258
	Cor Total	487.729	14
		Std. Dev.	2.43102		R-Squared	0.903063
		Mean	93.8401		Adj R-Squared	0.830361
		C.V. %	2.5906		Pred R-Squared	0.620908
		PRESS	184.894		Adeq Precision	10.7076
		Coefficient		Standard	95% CI	95% CI
	Factor	Estimate	df	Error	Low	High	VIF
	Intercept	98.8804	1	1.16782	96.1874	101.573
	A-pH	-1.15046	1	0.859495	-3.13246	0.831536	1
	B-metal conc.	-2.14712	1	0.859495	-4.12912	-0.165126	1
	C-Algal dose	3.72434	1	0.859495	1.74234	5.70634	1
	BC	5.16675	1	1.21551	2.36378	7.96972	1
	A^2	-3.12739	1	1.26139	-6.03617	-0.218612	1.00513
	C^2	-6.32314	1	1.26139	-9.23192	-3.41436	1.00513
	Final Equation in Terms of Coded Factors:
		metal removal	=
		98.8804
		-1.15046	* A
		-2.14712	* B
		3.72434	* C
		5.16675	* B * C
		-3.12739	* A^2
		-6.32314	* C^2
	Final Equation in Terms of Actual Factors:
		metal removal	=
		87.0448
		3.78637	* pH
		-0.430278	* metal conc.
		2.94552	* Algal dose
		0.0645844	* metal conc. * Algal dose
		-0.347488	* pH^2
		-0.395196	* Algal dose^2

## Sheet: Sheet3
	Diagnostics Case Statistics
						Internally	Externally	Influence on
	Standard	Actual	Predicted			Studentized	Studentized	Fitted Value	Cook's	Run
	Order	Value	Value	Residual	Leverage	Residual	Residual	DFFITS	Distance	Order
	1	98.76	99.0506	-0.29062	0.442308	-0.160081	-0.149983	-0.133569	0.00290344	4
	2	96.97	96.7497	0.220305	0.442308	0.12135	0.113617	0.101183	0.00166843	3
	3	93.848	94.7564	-0.90837	0.442308	-0.500354	-0.475538	-0.423497	0.0283652	8
	4	96.632	92.4554	4.17655	0.442308	2.30055	3.69915	* 3.29	0.599649	1
	5	87.13	86.856	0.273983	0.442308	0.150917	0.141371	0.1259	0.00258052	15
	6	81.55	84.5551	-3.00509	0.442308	-1.65528	-1.90953	-1.70056	0.310439	13
	7	95.2297	94.3047	0.925008	0.442308	0.509518	0.484537	0.431511	0.0294138	7
	8	90.612	92.0038	-1.39177	0.442308	-0.766622	-0.744996	-0.663466	0.0665877	17
	9	98.347	96.1468	2.20018	0.692308	1.63159	1.86842	* 2.80	0.855673	9
	10	82.05	81.5191	0.53093	0.692308	0.393723	0.371915	0.557872	0.0498271	10
	11	94.33	93.262	1.068	0.692308	0.792003	0.771723	1.15758	0.201622	11
	12	98.7	99.3012	-0.601245	0.692308	-0.445867	-0.422351	-0.633526	0.0638991	6
	13	99.4767	98.8804	0.596277	0.230769	0.279661	0.262887	0.143989	0.00335186	14
	14	98.1667	98.8804	-0.713723	0.230769	-0.334744	-0.315341	-0.172719	0.0048023	12
	15	95.8	98.8804	-3.08042	0.230769	-1.44475	-1.57199	-0.861016	0.0894563	16
