# Supplementary material for: Response surface optimization for cadmium biosorption onto the pre-treated biomass of red algae Digenia simplex as a sustainable indigenous biosorbent
Source: PeerJ. 2025 Aug 4;13:e19776. doi: 10.7717/peerj.19776 (PMC12330821; doi:10.7717/peerj.19776)
Supplement: Supplemental Information 3 [file peerj-13-19776-s003.xlsx]

## Sheet: Contact time
	mg/L	mg/L					dry wt.		adsorbed (mg/g dry wt)
time	Ci	Ceq	adsorbed(Ci-Ceq)				g		(q)
0	30	16.95	13.05				0.5		2.61
10	30	0.765	29.235				0.5		5.847
20	30	0.367	29.633				0.5		5.9266
30	30	1	29				0.5		5.8
60	30	1.07	28.93				0.5		5.786
90	30	1.03	28.97				0.5		5.794
120	30	1.391	28.609				0.5		5.7218
150	30	1.737	28.263				0.5		5.6526
	time	% removal = Ci– Cf/Cix100
		(q)	R (%)
		0
	0	2.61	43.5
	10	5.847	97.45
	20	5.9266	98.7767
	30	5.682	96.6667
	60	5.786	96.4333
	90	5.794	96.5667
	120	5.7218	95.3633
	150	5.6526	94.21

## Sheet: Cd conc.
		Cd conc.
			mg/L	mg/L		dry wt.		adsorbed (mg/g dry wt)
			Ci	Ceq		g		(q)
			10	0.1158		0.5		1.97684
			20	0.29		0.5		3.942
			30	0.716		0.5		5.8568
			40	1.08		0.5		7.784
			50	2.977		0.5		9.4046
		% removal = Ci– Cf/Cix100
			(q)	R (%)
			0
		10	1.97684	98.842
		20	3.942	98.55
		30	5.8568	97.6133
		40	7.784	97.3
		50	9.4046	94.046
			q	ln q			Ceq	ln ceq	(q)	Ceq/q
			1.97684	0.6815			0.1158	-2.15589	1.97684	0.0585783
			3.942	1.37169			0.29	-1.23787	3.942	0.0735667
			5.8568	1.7676			0.716	-0.334075	5.8568	0.122251
			7.784	2.05207			1.08	0.076961	7.784	0.138746
			9.4046	2.2412			2.977	1.09092	9.4046	0.316547
			.
														langmuir parameters
															1/qmax= slope
															qmax= 1/slope
															qmax= 1/0.0197
														qmax =	11.1607
			ln ceq	ln q
			-2.15589	0.6815										intercept= 1/qmaxb
			-1.23787	1.37169
			-0.334075	1.7676										0.0621= 1/qmaxb
			0.076961	2.05207										b=1/11.1607*0.0491
			1.09092	2.2412									b=	1
						1/n= slope
						n=1/slope
						n=1/0.4856
						2.05931
						ln Kf = intercept
						ln Kf= 1.8714
						Kf=	6.497

## Sheet: separation factor
			b: langmuir constant
			RL: separation factor
	mg/L		RL= 1/(1+(1+bCi))
	Ci
	10			0.0833333
	20			0.0454545
	30			0.03125
	40			0.0238095
	50			0.0192308
				RL = 0.019-0.083

## Sheet: experimental design
Std order	mg/L	mg/L		dry wt.			% removal = Ci– Cf/Cix100
	Ci	Ceq		g
1	10	0.124		0.5		10	98.76
2	10	0.303		0.5		10	96.97
3	50	3.076		0.5		50	93.848
4	50	1.684		0.5		50	96.632
5	30	3.86		0.1		30	87.1333
6	30	5.535		0.1		30	81.55
7	30	1.4311		0.9		30	95.2297
8	30	2.8164		0.9		30	90.612
9	10	0.1653		0.1		10	98.347
10	50	8.975		0.1		50	82.05
11	10	0.567		0.9		10	94.33
12	50	0.65		0.9		50	98.7
13	30	0.157		0.5		30	99.4767
14	30	0.549		0.5		30	98.17
15	30	1.26		0.5		30	95.8

## Sheet: Dubinin and Radushkevich
			Ceq	1/Ceq	(1+1/Ceq)	ln(1+1/Ceq)	ɛ=8.3*298*ln(1+1/Ceq)	ɛ2	ɛ2
			0.1158	8.63558	9.63558	2.26546	5603.39	3.1398e+07	3.1398e+07
			0.29	3.44828	4.44828	1.49252	3691.59	1.36278e+07	1.36278e+07
			0.716	1.39665	2.39665	0.874071	2161.93	4.67393e+06	4.67393e+06
			1.08	0.925926	1.92593	0.655407	1621.08	2.62791e+06	2.62791e+06
			2.977	0.335909	1.33591	0.289612	716.326	513122	513122
								ɛ2	ln q
								3.1398e+07	0.6815
								1.36278e+07	1.37169
								4.67393e+06	1.7676
								2.62791e+06	2.05207
								513122	2.2412
						lnq0=intercept
						lnq0=2.13
						q0= 8.415
		R=8.314		T= 298
						β= slope= 5x10-8
							E =√(1/2*0.00000005

## Sheet: first order
					qeexp.
			t	qt	qe	(qe-qt)	log (qe-qt)
			0	2.61	5.9266	3.3166	0.520693
			10	5.847	5.9266	0.0796	0
			20	5.9266	5.9266	0	0
			30	5.8	5.9266	0.1266	-0.897566
			60	5.786	5.9266	0.1406	-0.852015
			90	5.794	5.9266	0.1326	-0.877456
						y = m x + c
						log (qe-qt) = -(k1/2.303) t + log qe
						so, y = log (qe-qt) ; m=-(k1/2.303) ; x=t ; c=log qe
						y=-0.0145x+0.156
						log (qe-qt) = -(k1/2.303) t + log qe
						(k1/2.303)=0.0145, so u will get k1= 0.033
							k1= 0.033
								slope= -k/2.303
								intercept= log qe
										intercept= log qe
										0.156=log qe
									qecal.	qe= 1.432

## Sheet: second order
			t	qt	t/qt
			0	2.61	0
			10	5.847	1.71028
			20	5.9266	3.37462
			30	5.8	5.17241
			60	5.786	10.3699
			90	5.794	15.5333
			120	5.7218	20.9724
			150	5.6526	26.5365
			1/qe=slope
		qecalc	qe=1/0.1763
			5.67215
										intercept=1/K2qe2
										intercept=1/K2qe2
								32.17	=qe2	0.1176=1/K2*5.67215X2
										K2=1/0.1176*32.17
										K2= 0.264

## Sheet: Intraparticle diffusion
					t	t0.5	qt
					0	0	2.61
					10	5	5.847
					20	10	5.9266
					30	15	5.8
					60	30	5.786
					90	45	5.794
					120	60	5.7218
					150	75	5.6526
		0	0	2.61
		10	5	5.847	R1=0.768
		20	10	5.9266	c1: intercept = 3.136
					k1= slope= 0.3317
		30	15	5.8
		60	30	5.786	R2=0.805
		90	45	5.794	c2: intercept = 5.858
		120	60	5.7218	k2= slope= 0.0024
		150	75	5.6526

## Sheet: Thermodynamic
						mg/L	mg/L				dry wt.		adsorbed (mg/g dry wt)
					oC	Ci	Ceq				g		(q)
					25	30	2.35				0.5		5.53
					35	30	1.993				0.5		5.6014
					45	30	0.935				0.5		5.813
																intercept = ΔS/R
																slope= -ΔH/R
						K	lnK									ΔS (kJ.mol-1)= intercept*R/1000
				q	Ceq	q/Ceq	ln q/Ceq	ΔG=-RTlnKc	ΔG (kJ.mol-1)		T	1/T	lnK				0.133522
				5.53	2.35	2.35319	0.855772	-2116.67	-2.11667		298	0.0033557	0.855772			ΔH (kJ. mol-1)= slope*R/1000
				5.6014	1.993	2.81054	1.03338	-2641.72	-2.64172		308	0.00324675	1.03338				38.0065
				5.813	0.935	6.21711	1.82731	-4822.99	-4.82299		318	0.00314465	1.82731
						R (%)	(q)
						0
					25	92.1667	5.53
					35	93.3567	5.6014
					45	96.8833	5.813

## Sheet: Sewage
				Electrical Conductivity (EC) (µs)	TDS (mg/L)		pH	Temperature
				1			8.74	17
				1001.5	640.96
				mg/L	mg/L
				Ci	Ceq
				30	0.622
					at pH: 6, contact time 90 min, 25 C, algal dose 0.5
				% removal = Ci– Cf/Cix100
						% removal = Ci– Cf/Cix100
						97.9267
