# Supplementary material for: Response surface optimization for cadmium biosorption onto the pre-treated biomass of red algae Digenia simplex as a sustainable indigenous biosorbent
Source: PeerJ. 2025 Aug 4;13:e19776. doi: 10.7717/peerj.19776 (PMC12330821; doi:10.7717/peerj.19776)
Supplement: Supplemental Information 4 [file peerj-13-19776-s004.xlsx]

## Sheet: FTIR before biosorption
399.692	0
400.174	0
400.656	0
401.138	0
401.62	0
402.102	0
402.584	0
403.067	0
403.549	0
404.031	0
404.513	0
404.995	0
405.477	0
405.959	0
406.442	0
406.924	0
407.406	0
407.888	0
408.37	0
408.852	0
409.334	0
409.817	0
410.299	0
410.781	0
411.263	0
411.745	0
412.227	0
412.709	0
413.192	0
413.674	0
414.156	0
414.638	0
415.12	0
415.602	0
416.084	0
416.567	0
417.049	0
417.531	0
418.013	0
418.495	0
418.977	0
419.459	0
419.942	0
420.424	0
420.906	0
421.388	0
421.87	0
422.352	0
422.834	0
423.316	0
423.799	0
424.281	0
424.763	0
425.245	0
425.727	0
426.209	0
426.691	0
427.173	0
427.656	0
428.138	0
428.62	0
429.102	0
429.584	0
430.066	0
430.548	0
431.031	0
431.513	0
431.995	0
432.477	0
432.959	0
433.441	0
433.923	0
434.406	0
434.888	88.3177
435.37	88.1313
435.852	88.0503
436.334	88.0952
436.816	88.2562
437.298	88.4933
437.781	88.747
438.263	88.9553
438.745	89.0695
439.227	89.0649
439.709	88.9471
440.191	88.7554
440.673	88.5582
441.156	88.4365
441.638	88.4563
442.12	88.6422
442.602	88.9668
443.084	89.3621
443.566	89.7438
444.048	90.0379
444.531	90.1994
445.013	90.2182
445.495	90.1147
445.977	89.9271
446.459	89.7004
446.941	89.4781
447.423	89.2954
447.905	89.1741
448.388	89.1158
448.87	89.1009
449.352	89.0939
449.834	89.055
450.316	88.9529
450.798	88.7763
451.28	88.5414
451.762	88.292
452.245	88.0861
452.727	87.9712
453.209	87.9584
453.691	88.0183
454.173	88.0981
454.655	88.148
455.137	88.139
455.62	88.0717
456.102	87.9739
456.584	87.8891
457.066	87.8548
457.548	87.879
458.03	87.9338
458.512	87.977
458.995	87.9848
459.477	87.9698
459.959	87.9735
460.441	88.0442
460.923	88.2125
461.405	88.4759
461.887	88.7945
462.37	89.1008
462.852	89.3209
463.334	89.4025
463.816	89.3327
464.298	89.1387
464.78	88.8712
465.262	88.582
465.745	88.3104
466.227	88.0804
466.709	87.9069
467.191	87.8036
467.673	87.7849
468.155	87.8617
468.637	88.0318
469.119	88.2742
469.602	88.5508
470.084	88.814
470.566	89.0177
471.048	89.1309
471.53	89.1519
472.012	89.1146
472.494	89.0782
472.977	89.0989
473.459	89.2009
473.941	89.3675
474.423	89.5538
474.905	89.711
475.387	89.8047
475.869	89.8267
476.351	89.7951
476.834	89.7468
477.316	89.7233
477.798	89.757
478.28	89.8591
478.762	90.0174
479.244	90.2002
479.726	90.3689
480.209	90.4911
480.691	90.5511
481.173	90.5555
481.655	90.5312
482.137	90.519
482.619	90.5628
483.101	90.6946
483.584	90.9214
484.066	91.2185
484.548	91.5351
485.03	91.8116
485.512	92.001
485.994	92.0865
486.476	92.0878
486.959	92.0516
487.441	92.0326
487.923	92.0717
488.405	92.1791
488.887	92.3306
489.369	92.4764
489.851	92.5587
490.334	92.535
490.816	92.3967
491.298	92.1752
491.78	91.9309
492.262	91.7293
492.744	91.6157
493.226	91.6014
493.709	91.6657
494.191	91.7704
494.673	91.8784
495.155	91.9679
495.637	92.0356
496.119	92.0917
496.601	92.1483
497.083	92.2109
497.566	92.2737
498.048	92.3234
498.53	92.3474
499.012	92.3414
499.494	92.3127
499.976	92.2769
500.458	92.2508
500.94	92.2445
501.423	92.2562
501.905	92.2734
502.387	92.2798
502.869	92.2658
503.351	92.236
503.833	92.2068
504.315	92.1996
504.798	92.2309
505.28	92.3054
505.762	92.4134
506.244	92.5315
506.726	92.6299
507.208	92.6829
507.69	92.6793
508.173	92.6249
508.655	92.5401
509.137	92.4503
509.619	92.3779
510.101	92.3361
510.583	92.3251
511.065	92.3341
511.548	92.3454
512.03	92.3416
512.512	92.3118
512.994	92.255
513.476	92.1799
513.958	92.1006
514.44	92.0309
514.923	91.9791
515.405	91.9445
515.887	91.9182
516.369	91.8868
516.851	91.8388
517.333	91.7707
517.815	91.6898
518.297	91.6109
518.78	91.5503
519.262	91.5187
519.744	91.5183
520.226	91.5446
520.708	91.5897
521.19	91.6473
521.672	91.7137
522.154	91.7876
522.637	91.8668
523.119	91.9457
523.601	92.0133
524.083	92.0558
524.565	92.0597
525.047	92.0194
525.529	91.942
526.012	91.8484
526.494	91.7668
526.976	91.7211
527.458	91.7222
527.94	91.7652
528.422	91.8324
528.904	91.8999
529.387	91.9435
529.869	91.9452
530.351	91.8965
530.833	91.8008
531.315	91.6724
531.797	91.534
532.279	91.4121
532.761	91.3318
533.244	91.3109
533.726	91.3544
534.208	91.4525
534.69	91.5821
535.172	91.7134
535.654	91.8196
536.136	91.8863
536.619	91.9164
537.101	91.9283
537.583	91.9468
538.065	91.9909
538.547	92.0629
539.029	92.1454
539.511	92.2077
539.994	92.2186
540.476	92.1608
540.958	92.0411
541.44	91.8902
541.922	91.7518
542.404	91.6657
542.886	91.6535
543.369	91.7121
543.851	91.8173
544.333	91.936
544.815	92.0403
545.297	92.1186
545.779	92.1789
546.261	92.2418
546.744	92.3272
547.226	92.443
547.708	92.5788
548.19	92.7104
548.672	92.8098
549.154	92.8576
549.636	92.8502
550.119	92.8
550.601	92.7287
551.083	92.6572
551.565	92.5982
552.047	92.553
552.529	92.5151
553.011	92.4765
553.494	92.433
553.976	92.388
554.458	92.3506
554.94	92.3316
555.422	92.3383
555.904	92.371
556.386	92.4222
556.868	92.4784
557.351	92.5246
557.833	92.5479
558.315	92.5411
558.797	92.5043
559.279	92.4452
559.761	92.3781
560.243	92.3213
560.726	92.2926
561.208	92.3046
561.69	92.3607
562.172	92.4535
562.654	92.5666
563.136	92.6798
563.618	92.7752
564.101	92.8429
564.583	92.8833
565.065	92.9044
565.547	92.9163
566.029	92.9243
566.511	92.9259
566.993	92.9116
567.476	92.8712
567.958	92.8011
568.44	92.7094
568.922	92.6157
569.404	92.5438
569.886	92.5129
570.368	92.5292
570.85	92.5832
571.332	92.6538
571.815	92.716
572.297	92.7509
572.779	92.7515
573.261	92.7239
573.743	92.6825
574.225	92.643
574.707	92.6159
575.19	92.603
575.672	92.5971
576.154	92.5871
576.636	92.5631
577.118	92.5213
577.6	92.4651
578.082	92.4034
578.565	92.3469
579.047	92.3061
579.529	92.2887
580.011	92.2986
580.493	92.3353
580.975	92.3934
581.457	92.464
581.94	92.5361
582.422	92.5988
582.904	92.6434
583.386	92.665
583.868	92.6626
584.35	92.6383
584.832	92.5964
585.314	92.5413
585.797	92.4779
586.279	92.4116
586.761	92.3506
587.243	92.3052
587.725	92.2873
588.207	92.3062
588.689	92.3652
589.172	92.4578
589.654	92.5681
590.136	92.6733
590.618	92.7503
591.1	92.7834
591.582	92.7706
592.064	92.7237
592.547	92.6637
593.029	92.6107
593.511	92.5765
593.993	92.5619
594.475	92.5591
594.957	92.5587
595.439	92.5555
595.922	92.5523
596.404	92.5582
596.886	92.5839
597.368	92.6362
597.85	92.7134
598.332	92.8055
598.814	92.8975
599.297	92.9752
599.779	93.0297
600.261	93.0597
600.743	93.0695
601.225	93.0639
601.707	93.0449
602.189	93.0097
602.671	92.9531
603.154	92.8725
603.636	92.7712
604.118	92.6608
604.6	92.5594
605.082	92.486
605.564	92.4544
606.046	92.4696
606.529	92.5256
607.011	92.6083
607.493	92.7003
607.975	92.7859
608.457	92.8555
608.939	92.9058
609.421	92.9397
609.904	92.9628
610.386	92.9806
610.868	92.9956
611.35	93.0064
611.832	93.0084
612.314	92.9953
612.796	92.9623
613.278	92.9087
613.761	92.8402
614.243	92.769
614.725	92.7117
615.207	92.6854
615.689	92.7027
616.171	92.7666
616.653	92.8685
617.136	92.9898
617.618	93.1071
618.1	93.1998
618.582	93.2564
619.064	93.277
619.546	93.2718
620.028	93.2554
620.51	93.2415
620.993	93.2381
621.475	93.2469
621.957	93.264
622.439	93.2845
622.921	93.3059
623.403	93.3292
623.885	93.3589
624.368	93.3995
624.85	93.4524
625.332	93.5138
625.814	93.5751
626.296	93.6252
626.778	93.6552
627.26	93.6607
627.743	93.6439
628.225	93.6116
628.707	93.5732
629.189	93.5372
629.671	93.5088
630.153	93.4892
630.635	93.4762
631.118	93.4664
631.6	93.4583
632.082	93.454
632.564	93.46
633.046	93.4857
633.528	93.5407
634.01	93.6302
634.492	93.7518
634.975	93.894
635.457	94.0377
635.939	94.1607
636.421	94.2436
636.903	94.2764
637.385	94.2604
637.867	94.2085
638.35	94.14
638.832	94.0747
639.314	94.0273
639.796	94.0043
640.278	94.0042
640.76	94.021
641.242	94.0483
641.725	94.0828
642.207	94.1253
642.689	94.1785
643.171	94.2441
643.653	94.3194
644.135	94.3966
644.617	94.4646
645.1	94.5127
645.582	94.5346
646.064	94.5304
646.546	94.506
647.028	94.4706
647.51	94.4333
647.992	94.4009
648.475	94.3766
648.957	94.3615
649.439	94.3556
649.921	94.3592
650.403	94.3732
650.885	94.3985
651.367	94.4343
651.849	94.4781
652.332	94.5259
652.814	94.5737
653.296	94.6185
653.778	94.6593
654.26	94.6964
654.742	94.7301
655.224	94.7595
655.707	94.7824
656.189	94.7961
656.671	94.799
657.153	94.7917
657.635	94.7771
658.117	94.759
658.599	94.7405
659.082	94.7229
659.564	94.7053
660.046	94.6863
660.528	94.6655
661.01	94.6452
661.492	94.6297
661.974	94.6239
662.457	94.6301
662.939	94.6463
663.421	94.6662
663.903	94.6806
664.385	94.681
664.867	94.6618
665.349	94.621
665.831	94.5597
666.313	94.4822
666.796	94.3966
667.278	94.317
667.76	94.2641
668.242	94.2581
668.724	94.3054
669.206	94.3942
669.688	94.505
670.171	94.6217
670.653	94.7348
671.135	94.838
671.617	94.9261
672.099	94.9942
672.581	95.0385
673.063	95.0586
673.546	95.0578
674.028	95.0425
674.51	95.0198
674.992	94.9951
675.474	94.9715
675.956	94.9503
676.438	94.9327
676.921	94.921
677.403	94.919
677.885	94.9305
678.367	94.9582
678.849	95.002
679.331	95.0589
679.813	95.1232
680.295	95.1886
680.778	95.2495
681.26	95.3019
681.742	95.3432
682.224	95.3721
682.706	95.3871
683.188	95.3875
683.67	95.3736
684.153	95.3476
684.635	95.3144
685.117	95.2804
685.599	95.252
686.081	95.2338
686.563	95.2279
687.045	95.2337
687.528	95.2485
688.01	95.2689
688.492	95.2912
688.974	95.3123
689.456	95.3292
689.938	95.3387
690.42	95.3374
690.903	95.3227
691.385	95.2929
691.867	95.2489
692.349	95.1936
692.831	95.1315
693.313	95.0671
693.795	95.0038
694.278	94.9424
694.76	94.8822
695.242	94.8202
695.724	94.7526
696.206	94.6754
696.688	94.5847
697.17	94.4781
697.653	94.3561
698.135	94.2233
698.617	94.0897
699.099	93.9698
699.581	93.8794
700.063	93.8318
700.545	93.8332
701.027	93.8792
701.51	93.9562
701.992	94.0437
702.474	94.12
702.956	94.1678
703.438	94.1775
703.92	94.1489
704.402	94.0883
704.885	94.0046
705.367	93.9051
705.849	93.7929
706.331	93.6674
706.813	93.5256
707.295	93.3637
707.777	93.1786
708.26	92.9667
708.742	92.7235
709.224	92.4438
709.706	92.1235
710.188	91.7639
710.67	91.3756
711.152	90.9804
711.635	90.6099
712.117	90.2998
712.599	90.0822
713.081	89.978
713.563	89.9928
714.045	90.1155
714.527	90.3214
715.009	90.5777
715.491	90.8511
715.974	91.1135
716.456	91.3462
716.938	91.5405
717.42	91.6964
717.902	91.8197
718.384	91.9196
718.866	92.007
719.349	92.0928
719.831	92.1868
720.313	92.296
720.795	92.4248
721.277	92.5745
721.759	92.7445
722.241	92.9336
722.724	93.1412
723.206	93.3674
723.688	93.6125
724.17	93.8754
724.652	94.1526
725.134	94.4373
725.616	94.7208
726.099	94.9947
726.581	95.2534
727.063	95.4954
727.545	95.7234
728.027	95.9419
728.509	96.155
728.991	96.3641
729.473	96.5675
729.956	96.7618
730.438	96.9443
730.92	97.1145
731.402	97.2744
731.884	97.427
732.366	97.5738
732.848	97.7131
733.331	97.8399
733.813	97.9475
734.295	98.0302
734.777	98.0858
735.259	98.1163
735.741	98.1269
736.223	98.1239
736.706	98.1126
737.188	98.0958
737.67	98.0753
738.152	98.0524
738.634	98.0299
739.116	98.012
739.598	98.0038
740.081	98.0099
740.563	98.0327
741.045	98.0726
741.527	98.1273
742.009	98.1937
742.491	98.2683
742.973	98.3474
743.456	98.4266
743.938	98.5007
744.42	98.5638
744.902	98.6098
745.384	98.6346
745.866	98.6376
746.348	98.622
746.83	98.5936
747.313	98.5592
747.795	98.5243
748.277	98.4923
748.759	98.4652
749.241	98.4447
749.723	98.4336
750.205	98.4363
750.688	98.4569
751.17	98.4972
751.652	98.5548
752.134	98.623
752.616	98.6917
753.098	98.7509
753.58	98.7943
754.062	98.8205
754.545	98.8334
755.027	98.8388
755.509	98.8419
755.991	98.8445
756.473	98.8447
756.955	98.8387
757.438	98.8234
757.92	98.7984
758.402	98.7666
758.884	98.733
759.366	98.7019
759.848	98.6757
760.33	98.6538
760.812	98.6337
761.295	98.6128
761.777	98.5897
762.259	98.5648
762.741	98.5397
763.223	98.5159
763.705	98.4942
764.187	98.4746
764.67	98.4572
765.152	98.4432
765.634	98.4353
766.116	98.4367
766.598	98.4495
767.08	98.4733
767.562	98.5045
768.044	98.5375
768.527	98.5662
769.009	98.587
769.491	98.5994
769.973	98.6055
770.455	98.6084
770.937	98.6095
771.419	98.6071
771.902	98.5976
772.384	98.5764
772.866	98.5411
773.348	98.4929
773.83	98.437
774.312	98.381
774.794	98.3327
775.277	98.2986
775.759	98.2832
776.241	98.2887
776.723	98.3168
777.205	98.3676
777.687	98.4402
778.169	98.5311
778.652	98.6335
779.134	98.7379
779.616	98.8339
780.098	98.9127
780.58	98.9695
781.062	99.0049
781.544	99.023
782.027	99.0289
782.509	99.0259
782.991	99.0133
783.473	98.9879
783.955	98.9465
784.437	98.8888
784.919	98.8201
785.401	98.7505
785.884	98.6921
786.366	98.6561
786.848	98.6487
787.33	98.6706
787.812	98.7173
788.294	98.7815
788.776	98.8553
789.259	98.9323
789.741	99.0077
790.223	99.0777
790.705	99.139
791.187	99.1886
791.669	99.2244
792.151	99.2469
792.634	99.2585
793.116	99.2634
793.598	99.266
794.08	99.2688
794.562	99.2726
795.044	99.2762
795.526	99.279
796.008	99.2819
796.491	99.2874
796.973	99.2986
797.455	99.3165
797.937	99.3387
798.419	99.359
798.901	99.3701
799.383	99.3669
799.865	99.3499
800.348	99.326
800.83	99.3063
801.312	99.3018
801.794	99.3191
802.276	99.3581
802.758	99.4129
803.24	99.4749
803.723	99.5371
804.205	99.5974
804.687	99.6583
805.169	99.7237
805.651	99.7957
806.133	99.8701
806.615	99.9373
807.098	99.9844
807.58	100
808.062	99.9782
808.544	99.9212
809.026	99.8373
809.508	99.7384
809.99	99.636
810.472	99.5391
810.955	99.4532
811.437	99.3814
811.919	99.3255
812.401	99.2869
812.883	99.2665
813.365	99.2644
813.847	99.2789
814.33	99.3073
814.812	99.3459
815.294	99.391
815.776	99.4389
816.258	99.4855
816.74	99.525
817.222	99.5504
817.705	99.5537
818.187	99.5285
818.669	99.4727
819.151	99.3903
819.633	99.2908
820.115	99.1866
820.597	99.0885
821.08	99.0024
821.562	98.9283
822.044	98.8615
822.526	98.7963
823.008	98.7294
823.49	98.6623
823.972	98.5998
824.455	98.5478
824.937	98.5098
825.419	98.4843
825.901	98.4653
826.383	98.4445
826.865	98.4148
827.347	98.3727
827.83	98.3198
828.312	98.2605
828.794	98.2006
829.276	98.144
829.758	98.0925
830.24	98.0455
830.722	98.0009
831.205	97.9568
831.687	97.9111
832.169	97.8615
832.651	97.8048
833.133	97.7369
833.615	97.6533
834.097	97.551
834.579	97.4285
835.062	97.2873
835.544	97.1304
836.026	96.9613
836.508	96.7835
836.99	96.6001
837.472	96.4148
837.954	96.2326
838.437	96.0595
838.919	95.9005
839.401	95.7579
839.883	95.6293
840.365	95.5082
840.847	95.3861
841.329	95.257
841.812	95.1199
842.294	94.9801
842.776	94.8465
843.258	94.726
843.74	94.6183
844.222	94.5127
844.704	94.3896
845.187	94.2265
845.669	94.006
846.151	93.723
846.633	93.3869
847.115	93.0186
847.597	92.6431
848.079	92.281
848.561	91.9414
849.043	91.621
849.526	91.3055
850.008	90.9762
850.49	90.6151
850.972	90.2099
851.454	89.7555
851.936	89.2538
852.418	88.7114
852.901	88.1392
853.383	87.5513
853.865	86.9647
854.347	86.3979
854.829	85.8699
855.311	85.398
855.793	84.9958
856.276	84.6725
856.758	84.4318
857.24	84.2728
857.722	84.1906
858.204	84.1769
858.686	84.2217
859.168	84.3143
859.651	84.4431
860.133	84.5968
860.615	84.7639
861.097	84.9335
861.579	85.0951
862.061	85.24
862.543	85.3608
863.025	85.4514
863.508	85.5067
863.99	85.5213
864.472	85.4897
864.954	85.4061
865.436	85.2641
865.918	85.0569
866.4	84.7765
866.883	84.4136
867.365	83.9583
867.847	83.4018
868.329	82.7395
868.811	81.9739
869.293	81.1168
869.775	80.1892
870.258	79.2193
870.74	78.239
871.222	77.2812
871.704	76.3769
872.186	75.5537
872.668	74.8339
873.15	74.2335
873.633	73.7613
874.115	73.4189
874.597	73.2036
875.079	73.1105
875.561	73.1351
876.043	73.2746
876.525	73.5284
877.008	73.897
877.49	74.3806
877.972	74.978
878.454	75.685
878.936	76.4936
879.418	77.3901
879.9	78.3544
880.382	79.3613
880.865	80.3824
881.347	81.391
881.829	82.3654
882.311	83.2922
882.793	84.1666
883.275	84.9903
883.757	85.7695
884.24	86.5122
884.722	87.2274
885.204	87.9231
885.686	88.6062
886.168	89.281
886.65	89.9474
887.132	90.6004
887.615	91.2305
888.097	91.8257
888.579	92.375
889.061	92.8712
889.543	93.3127
890.025	93.7029
890.507	94.0481
890.989	94.3546
891.472	94.6278
891.954	94.8713
892.436	95.089
892.918	95.2851
893.4	95.4651
893.882	95.6341
894.364	95.7956
894.847	95.9501
895.329	96.0953
895.811	96.2275
896.293	96.3439
896.775	96.4441
897.257	96.5306
897.739	96.6074
898.221	96.6774
898.704	96.7417
899.186	96.799
899.668	96.8475
900.15	96.8875
900.632	96.9221
901.114	96.9582
901.596	97.0033
902.079	97.0637
902.561	97.141
903.043	97.2324
903.525	97.3312
904.007	97.4293
904.489	97.5199
904.971	97.5985
905.454	97.6627
905.936	97.711
906.418	97.7413
906.9	97.7508
907.382	97.7374
907.864	97.7009
908.346	97.6444
908.829	97.5737
909.311	97.4963
909.793	97.4183
910.275	97.3441
910.757	97.2753
911.239	97.2127
911.721	97.158
912.203	97.1144
912.686	97.0862
913.168	97.077
913.65	97.0869
914.132	97.1115
914.614	97.1419
915.096	97.167
915.578	97.1765
916.061	97.1639
916.543	97.1268
917.025	97.0665
917.507	96.9858
917.989	96.8865
918.471	96.7695
918.953	96.6353
919.436	96.4861
919.918	96.3267
920.4	96.1644
920.882	96.0075
921.364	95.8626
921.846	95.733
922.328	95.6178
922.811	95.5126
923.293	95.4125
923.775	95.3132
924.257	95.2126
924.739	95.1102
925.221	95.0066
925.703	94.9015
926.186	94.7938
926.668	94.682
927.15	94.5657
927.632	94.4462
928.114	94.3268
928.596	94.2121
929.078	94.1061
929.56	94.0117
930.043	93.9293
930.525	93.8584
931.007	93.7973
931.489	93.7447
931.971	93.6992
932.453	93.6595
932.935	93.6229
933.418	93.5858
933.9	93.5438
934.382	93.4934
934.864	93.4336
935.346	93.366
935.828	93.2951
936.31	93.2261
936.793	93.1637
937.275	93.1106
937.757	93.0676
938.239	93.0345
938.721	93.0112
939.203	92.9988
939.685	92.999
940.167	93.0127
940.65	93.0382
941.132	93.0706
941.614	93.102
942.096	93.1231
942.578	93.126
943.06	93.1058
943.542	93.0611
944.024	92.994
944.507	92.9075
944.989	92.8042
945.471	92.6864
945.953	92.5559
946.435	92.4157
946.917	92.2706
947.399	92.1268
947.882	91.9911
948.364	91.8689
948.846	91.7627
949.328	91.6718
949.81	91.5932
950.292	91.5228
950.774	91.4567
951.257	91.3916
951.739	91.325
952.221	91.2538
952.703	91.1742
953.185	91.0818
953.667	90.9725
954.149	90.8439
954.632	90.6964
955.114	90.5328
955.596	90.3578
956.078	90.1758
956.56	89.9907
957.042	89.8045
957.524	89.6189
958.006	89.4356
958.489	89.2569
958.971	89.0861
959.453	88.9259
959.935	88.7774
960.417	88.6394
960.899	88.508
961.381	88.378
961.864	88.2441
962.346	88.103
962.828	87.9535
963.31	87.797
963.792	87.6363
964.274	87.4746
964.756	87.3143
965.239	87.1573
965.721	87.0046
966.203	86.8568
966.685	86.7144
967.167	86.5776
967.649	86.4462
968.131	86.3193
968.614	86.1953
969.096	86.0721
969.578	85.9479
970.06	85.821
970.542	85.6902
971.024	85.5546
971.506	85.4134
971.989	85.266
972.471	85.1121
972.953	84.9528
973.435	84.79
973.917	84.627
974.399	84.4674
974.881	84.3147
975.364	84.1709
975.846	84.0362
976.328	83.9093
976.81	83.7878
977.292	83.6688
977.774	83.5493
978.256	83.4268
978.738	83.2987
979.221	83.1624
979.703	83.0151
980.185	82.8543
980.667	82.6787
981.149	82.4884
981.631	82.2857
982.113	82.0746
982.596	81.8599
983.078	81.6467
983.56	81.4393
984.042	81.241
984.524	81.0539
985.006	80.8795
985.488	80.7186
985.971	80.5714
986.453	80.4377
986.935	80.3163
987.417	80.2051
987.899	80.1013
988.381	80.0016
988.863	79.9023
989.346	79.8004
989.828	79.6935
990.31	79.5802
990.792	79.4597
991.274	79.3321
991.756	79.1977
992.238	79.0574
992.72	78.9124
993.202	78.7644
993.685	78.6156
994.167	78.4683
994.649	78.3247
995.131	78.1867
995.613	78.0553
996.095	77.9307
996.577	77.8125
997.06	77.6998
997.542	77.5914
998.024	77.4863
998.506	77.384
998.988	77.2841
999.47	77.1864
999.952	77.0906
1000.43	76.9963
1000.92	76.9026
1001.4	76.809
1001.88	76.7149
1002.36	76.6203
1002.85	76.5254
1003.33	76.4309
1003.81	76.337
1004.29	76.2441
1004.77	76.1518
1005.26	76.0596
1005.74	75.967
1006.22	75.8735
1006.7	75.7788
1007.18	75.6825
1007.67	75.5844
1008.15	75.4836
1008.63	75.3794
1009.11	75.2708
1009.6	75.1579
1010.08	75.0415
1010.56	74.9237
1011.04	74.8074
1011.52	74.6957
1012.01	74.5915
1012.49	74.4964
1012.97	74.4108
1013.45	74.3343
1013.93	74.2657
1014.42	74.2035
1014.9	74.1462
1015.38	74.092
1015.86	74.0389
1016.35	73.9849
1016.83	73.9277
1017.31	73.8659
1017.79	73.7987
1018.27	73.7264
1018.76	73.6501
1019.24	73.5715
1019.72	73.4921
1020.2	73.413
1020.68	73.3351
1021.17	73.2592
1021.65	73.1858
1022.13	73.1158
1022.61	73.0497
1023.1	72.9877
1023.58	72.9293
1024.06	72.8733
1024.54	72.8181
1025.02	72.7624
1025.51	72.7053
1025.99	72.6467
1026.47	72.5866
1026.95	72.5247
1027.43	72.4603
1027.92	72.3919
1028.4	72.3179
1028.88	72.2374
1029.36	72.1507
1029.85	72.0595
1030.33	71.9665
1030.81	71.8747
1031.29	71.787
1031.77	71.7054
1032.26	71.6317
1032.74	71.5674
1033.22	71.5145
1033.7	71.4753
1034.18	71.452
1034.67	71.4458
1035.15	71.4563
1035.63	71.4814
1036.11	71.5178
1036.6	71.5623
1037.08	71.6123
1037.56	71.6668
1038.04	71.7254
1038.52	71.7879
1039.01	71.8531
1039.49	71.9194
1039.97	71.984
1040.45	72.0444
1040.93	72.099
1041.42	72.1472
1041.9	72.1894
1042.38	72.226
1042.86	72.2574
1043.35	72.2834
1043.83	72.3035
1044.31	72.3179
1044.79	72.3273
1045.27	72.3333
1045.76	72.338
1046.24	72.3426
1046.72	72.3474
1047.2	72.3515
1047.68	72.353
1048.17	72.35
1048.65	72.3416
1049.13	72.3281
1049.61	72.3104
1050.1	72.2896
1050.58	72.2662
1051.06	72.2396
1051.54	72.2088
1052.02	72.1728
1052.51	72.1315
1052.99	72.0863
1053.47	72.0394
1053.95	71.993
1054.43	71.9488
1054.92	71.9072
1055.4	71.8675
1055.88	71.8285
1056.36	71.7899
1056.85	71.7524
1057.33	71.7176
1057.81	71.6881
1058.29	71.666
1058.77	71.6526
1059.26	71.6484
1059.74	71.6532
1060.22	71.6671
1060.7	71.6904
1061.18	71.7238
1061.67	71.7675
1062.15	71.8206
1062.63	71.881
1063.11	71.9456
1063.6	72.011
1064.08	72.0746
1064.56	72.1347
1065.04	72.1908
1065.52	72.2428
1066.01	72.2905
1066.49	72.3335
1066.97	72.3707
1067.45	72.4013
1067.93	72.4251
1068.42	72.4425
1068.9	72.4549
1069.38	72.4635
1069.86	72.4697
1070.34	72.4744
1070.83	72.478
1071.31	72.4813
1071.79	72.4853
1072.27	72.4915
1072.76	72.5013
1073.24	72.5157
1073.72	72.5344
1074.2	72.5556
1074.68	72.5769
1075.17	72.5956
1075.65	72.6096
1076.13	72.6181
1076.61	72.6209
1077.09	72.6178
1077.58	72.6082
1078.06	72.59
1078.54	72.5606
1079.02	72.5176
1079.51	72.4606
1079.99	72.3925
1080.47	72.3202
1080.95	72.2543
1081.43	72.2076
1081.92	72.1927
1082.4	72.2194
1082.88	72.2924
1083.36	72.4109
1083.84	72.5682
1084.33	72.7527
1084.81	72.9501
1085.29	73.1463
1085.77	73.3294
1086.26	73.4923
1086.74	73.6333
1087.22	73.7552
1087.7	73.8636
1088.18	73.9647
1088.67	74.0633
1089.15	74.162
1089.63	74.2611
1090.11	74.3597
1090.59	74.4563
1091.08	74.55
1091.56	74.6405
1092.04	74.7275
1092.52	74.8114
1093.01	74.8919
1093.49	74.9694
1093.97	75.0444
1094.45	75.118
1094.93	75.1915
1095.42	75.2661
1095.9	75.3425
1096.38	75.4201
1096.86	75.4979
1097.34	75.5745
1097.83	75.6487
1098.31	75.7204
1098.79	75.7895
1099.27	75.8561
1099.76	75.9198
1100.24	75.9792
1100.72	76.0322
1101.2	76.0767
1101.68	76.1112
1102.17	76.1354
1102.65	76.1501
1103.13	76.1567
1103.61	76.157
1104.09	76.1522
1104.58	76.1436
1105.06	76.1316
1105.54	76.1171
1106.02	76.1008
1106.51	76.0838
1106.99	76.0672
1107.47	76.0522
1107.95	76.0399
1108.43	76.0316
1108.91	76.0287
1109.4	76.0329
1109.88	76.0458
1110.36	76.0687
1110.84	76.1018
1111.33	76.1442
1111.81	76.1941
1112.29	76.2488
1112.77	76.306
1113.26	76.3643
1113.74	76.4231
1114.22	76.4828
1114.7	76.5441
1115.18	76.6074
1115.66	76.6725
1116.15	76.7387
1116.63	76.8052
1117.11	76.8715
1117.59	76.9374
1118.08	77.0025
1118.56	77.0667
1119.04	77.1293
1119.52	77.1894
1120.01	77.2465
1120.49	77.3008
1120.97	77.3539
1121.45	77.4076
1121.93	77.464
1122.41	77.5243
1122.9	77.5885
1123.38	77.6554
1123.86	77.7234
1124.34	77.7908
1124.83	77.8573
1125.31	77.9232
1125.79	77.9893
1126.27	78.0559
1126.76	78.1228
1127.24	78.1885
1127.72	78.2515
1128.2	78.3103
1128.68	78.3645
1129.16	78.4147
1129.65	78.462
1130.13	78.5074
1130.61	78.5515
1131.09	78.5946
1131.58	78.6372
1132.06	78.6805
1132.54	78.7263
1133.02	78.7768
1133.5	78.8338
1133.99	78.8977
1134.47	78.9673
1134.95	79.0399
1135.43	79.1121
1135.91	79.1809
1136.4	79.2443
1136.88	79.3013
1137.36	79.3514
1137.84	79.3937
1138.33	79.4265
1138.81	79.4481
1139.29	79.457
1139.77	79.4533
1140.25	79.4389
1140.74	79.4171
1141.22	79.3917
1141.7	79.366
1142.18	79.3419
1142.66	79.3198
1143.15	79.2993
1143.63	79.2801
1144.11	79.2621
1144.59	79.2459
1145.08	79.2317
1145.56	79.2191
1146.04	79.2068
1146.52	79.193
1147	79.1756
1147.49	79.154
1147.97	79.1287
1148.45	79.1014
1148.93	79.0742
1149.41	79.0483
1149.9	79.0238
1150.38	78.9999
1150.86	78.9751
1151.34	78.9487
1151.83	78.921
1152.31	78.8932
1152.79	78.8671
1153.27	78.8434
1153.75	78.8219
1154.24	78.8006
1154.72	78.7768
1155.2	78.7483
1155.68	78.7134
1156.16	78.6721
1156.65	78.6255
1157.13	78.5753
1157.61	78.5235
1158.09	78.472
1158.58	78.4228
1159.06	78.3784
1159.54	78.3414
1160.02	78.3148
1160.5	78.3009
1160.99	78.3009
1161.47	78.3146
1161.95	78.3406
1162.43	78.3767
1162.91	78.4207
1163.4	78.4712
1163.88	78.5273
1164.36	78.5883
1164.84	78.6532
1165.33	78.7208
1165.81	78.7894
1166.29	78.8575
1166.77	78.9253
1167.25	78.994
1167.74	79.0667
1168.22	79.1466
1168.7	79.2363
1169.18	79.3372
1169.66	79.4491
1170.15	79.5704
1170.63	79.6992
1171.11	79.8339
1171.59	79.9728
1172.08	80.1142
1172.56	80.2558
1173.04	80.3943
1173.52	80.526
1174	80.6476
1174.49	80.7578
1174.97	80.8571
1175.45	80.9477
1175.93	81.0328
1176.41	81.1148
1176.9	81.195
1177.38	81.2737
1177.86	81.351
1178.34	81.4273
1178.83	81.5043
1179.31	81.5845
1179.79	81.67
1180.27	81.7615
1180.75	81.8578
1181.24	81.9556
1181.72	82.0511
1182.2	82.1411
1182.68	82.2236
1183.16	82.2977
1183.65	82.3636
1184.13	82.421
1184.61	82.4693
1185.09	82.5078
1185.58	82.5367
1186.06	82.558
1186.54	82.5753
1187.02	82.5933
1187.5	82.6159
1187.99	82.645
1188.47	82.6802
1188.95	82.7187
1189.43	82.7572
1189.91	82.7926
1190.4	82.8233
1190.88	82.849
1191.36	82.8695
1191.84	82.884
1192.33	82.8908
1192.81	82.8877
1193.29	82.873
1193.77	82.8467
1194.25	82.8115
1194.74	82.7715
1195.22	82.7317
1195.7	82.6961
1196.18	82.6672
1196.66	82.6459
1197.15	82.632
1197.63	82.6246
1198.11	82.6235
1198.59	82.6278
1199.08	82.6362
1199.56	82.6457
1200.04	82.6523
1200.52	82.651
1201	82.6378
1201.49	82.6104
1201.97	82.5686
1202.45	82.5144
1202.93	82.4504
1203.41	82.3793
1203.9	82.3033
1204.38	82.2245
1204.86	82.1456
1205.34	82.0704
1205.83	82.0033
1206.31	81.9487
1206.79	81.9097
1207.27	81.8867
1207.75	81.8772
1208.24	81.8768
1208.72	81.8807
1209.2	81.8845
1209.68	81.8855
1210.16	81.8823
1210.65	81.8742
1211.13	81.8599
1211.61	81.8377
1212.09	81.8055
1212.58	81.7625
1213.06	81.7093
1213.54	81.6492
1214.02	81.5863
1214.5	81.5251
1214.99	81.4688
1215.47	81.4188
1215.95	81.3749
1216.43	81.336
1216.91	81.3014
1217.4	81.2709
1217.88	81.2443
1218.36	81.2213
1218.84	81.1999
1219.33	81.1771
1219.81	81.1493
1220.29	81.1136
1220.77	81.0689
1221.25	81.0162
1221.74	80.9585
1222.22	80.8991
1222.7	80.8404
1223.18	80.7837
1223.66	80.7289
1224.15	80.676
1224.63	80.6252
1225.11	80.5781
1225.59	80.5365
1226.08	80.5021
1226.56	80.4749
1227.04	80.4531
1227.52	80.4333
1228	80.4117
1228.48	80.3852
1228.97	80.3521
1229.45	80.3123
1229.93	80.2663
1230.41	80.215
1230.9	80.1588
1231.38	80.0979
1231.86	80.0333
1232.34	79.9668
1232.83	79.902
1233.31	79.8428
1233.79	79.793
1234.27	79.7548
1234.75	79.7284
1235.23	79.7123
1235.72	79.7037
1236.2	79.6996
1236.68	79.6974
1237.16	79.695
1237.65	79.6905
1238.13	79.6817
1238.61	79.6659
1239.09	79.641
1239.58	79.6058
1240.06	79.5608
1240.54	79.5087
1241.02	79.4533
1241.5	79.3984
1241.98	79.347
1242.47	79.3006
1242.95	79.2596
1243.43	79.2234
1243.91	79.1923
1244.4	79.1665
1244.88	79.147
1245.36	79.1337
1245.84	79.1258
1246.33	79.1207
1246.81	79.1152
1247.29	79.1062
1247.77	79.0916
1248.25	79.0714
1248.73	79.0469
1249.22	79.0199
1249.7	78.9919
1250.18	78.9637
1250.66	78.9352
1251.15	78.9064
1251.63	78.8782
1252.11	78.8524
1252.59	78.8311
1253.07	78.8166
1253.56	78.8096
1254.04	78.8092
1254.52	78.8133
1255	78.8191
1255.48	78.8245
1255.97	78.8286
1256.45	78.8314
1256.93	78.8331
1257.41	78.8334
1257.9	78.8312
1258.38	78.825
1258.86	78.8138
1259.34	78.7979
1259.82	78.7798
1260.31	78.7629
1260.79	78.7506
1261.27	78.7448
1261.75	78.7454
1262.23	78.7504
1262.72	78.7576
1263.2	78.7652
1263.68	78.773
1264.16	78.7815
1264.65	78.7912
1265.13	78.8017
1265.61	78.8112
1266.09	78.8171
1266.57	78.8172
1267.06	78.8111
1267.54	78.7999
1268.02	78.7866
1268.5	78.7745
1268.98	78.7657
1269.47	78.7613
1269.95	78.7608
1270.43	78.7631
1270.91	78.7677
1271.4	78.7746
1271.88	78.7844
1272.36	78.7976
1272.84	78.8136
1273.32	78.8306
1273.81	78.8461
1274.29	78.8579
1274.77	78.865
1275.25	78.8679
1275.73	78.8677
1276.22	78.8655
1276.7	78.8616
1277.18	78.8547
1277.66	78.8434
1278.15	78.8263
1278.63	78.8043
1279.11	78.7795
1279.59	78.7558
1280.07	78.7368
1280.56	78.7251
1281.04	78.7212
1281.52	78.7245
1282	78.7337
1282.48	78.7479
1282.97	78.7672
1283.45	78.7922
1283.93	78.8232
1284.41	78.8593
1284.9	78.8978
1285.38	78.9353
1285.86	78.9684
1286.34	78.9952
1286.82	79.0153
1287.31	79.0301
1287.79	79.0409
1288.27	79.0484
1288.75	79.0519
1289.23	79.0501
1289.72	79.042
1290.2	79.0278
1290.68	79.0094
1291.16	78.9895
1291.64	78.9706
1292.13	78.9541
1292.61	78.9397
1293.09	78.9263
1293.57	78.9128
1294.06	78.8992
1294.54	78.8866
1295.02	78.8767
1295.5	78.8706
1295.98	78.8675
1296.47	78.8651
1296.95	78.8599
1297.43	78.8491
1297.91	78.8315
1298.39	78.808
1298.88	78.781
1299.36	78.7527
1299.84	78.7239
1300.32	78.6938
1300.81	78.6603
1301.29	78.6216
1301.77	78.5773
1302.25	78.5289
1302.73	78.4789
1303.22	78.4297
1303.7	78.3826
1304.18	78.337
1304.66	78.2914
1305.14	78.2439
1305.63	78.1941
1306.11	78.1426
1306.59	78.0913
1307.07	78.0413
1307.56	77.9927
1308.04	77.9442
1308.52	77.8935
1309	77.839
1309.48	77.7805
1309.97	77.7197
1310.45	77.6589
1310.93	77.6002
1311.41	77.5439
1311.89	77.4885
1312.38	77.4315
1312.86	77.3707
1313.34	77.3057
1313.82	77.2382
1314.31	77.1715
1314.79	77.1085
1315.27	77.0503
1315.75	76.9963
1316.23	76.9443
1316.72	76.892
1317.2	76.8382
1317.68	76.7834
1318.16	76.7293
1318.64	76.6775
1319.13	76.6287
1319.61	76.5821
1320.09	76.5359
1320.57	76.489
1321.06	76.4417
1321.54	76.3961
1322.02	76.3551
1322.5	76.3204
1322.98	76.2925
1323.47	76.2691
1323.95	76.2468
1324.43	76.2218
1324.91	76.1913
1325.39	76.1547
1325.88	76.1123
1326.36	76.0649
1326.84	76.0121
1327.32	75.9526
1327.81	75.8846
1328.29	75.8067
1328.77	75.7197
1329.25	75.6259
1329.73	75.529
1330.22	75.4323
1330.7	75.3378
1331.18	75.2459
1331.66	75.1558
1332.14	75.0669
1332.63	74.9797
1333.11	74.8956
1333.59	74.8166
1334.07	74.7437
1334.56	74.6767
1335.04	74.6136
1335.52	74.5513
1336	74.4874
1336.48	74.4206
1336.97	74.3515
1337.45	74.2815
1337.93	74.2115
1338.41	74.1411
1338.89	74.0678
1339.38	73.9889
1339.86	73.9037
1340.34	73.8144
1340.82	73.7264
1341.31	73.6449
1341.79	73.5734
1342.27	73.5122
1342.75	73.4587
1343.23	73.4086
1343.72	73.3579
1344.2	73.3037
1344.68	73.2452
1345.16	73.1836
1345.64	73.12
1346.13	73.0551
1346.61	72.9879
1347.09	72.9166
1347.57	72.839
1348.06	72.7541
1348.54	72.6629
1349.02	72.5676
1349.5	72.4707
1349.98	72.3739
1350.47	72.2775
1350.95	72.1804
1351.43	72.0811
1351.91	71.9788
1352.39	71.8734
1352.88	71.7654
1353.36	71.6549
1353.84	71.5416
1354.32	71.4241
1354.81	71.3015
1355.29	71.1739
1355.77	71.043
1356.25	70.9119
1356.73	70.7843
1357.22	70.6628
1357.7	70.5483
1358.18	70.4402
1358.66	70.3371
1359.14	70.2378
1359.63	70.1422
1360.11	70.0506
1360.59	69.9636
1361.07	69.8801
1361.56	69.7965
1362.04	69.7065
1362.52	69.6034
1363	69.4832
1363.48	69.3476
[truncated: 5,469 more rows]

## Sheet: FTIR after biosorption
399.692	0
400.174	0
400.656	0
401.138	0
401.62	0
402.102	0
402.584	0
403.067	0
403.549	0
404.031	0
404.513	0
404.995	0
405.477	0
405.959	0
406.442	0
406.924	0
407.406	0
407.888	0
408.37	0
408.852	0
409.334	0
409.817	0
410.299	0
410.781	0
411.263	0
411.745	0
412.227	0
412.709	0
413.192	0
413.674	0
414.156	0
414.638	0
415.12	0
415.602	0
416.084	0
416.567	0
417.049	0
417.531	0
418.013	0
418.495	0
418.977	0
419.459	0
419.942	0
420.424	0
420.906	0
421.388	0
421.87	0
422.352	0
422.834	0
423.316	0
423.799	0
424.281	0
424.763	0
425.245	0
425.727	0
426.209	0
426.691	0
427.173	0
427.656	0
428.138	0
428.62	0
429.102	0
429.584	0
430.066	0
430.548	0
431.031	0
431.513	0
431.995	0
432.477	0
432.959	0
433.441	0
433.923	0
434.406	0
434.888	93.3994
435.37	92.8237
435.852	92.2172
436.334	91.6887
436.816	91.3398
437.298	91.2321
437.781	91.3688
438.263	91.6988
438.745	92.1365
439.227	92.5834
439.709	92.9444
440.191	93.1433
440.673	93.1393
441.156	92.942
441.638	92.6129
442.12	92.2455
442.602	91.9318
443.084	91.7325
443.566	91.6617
444.048	91.6925
444.531	91.775
445.013	91.8571
445.495	91.9025
445.977	91.8971
446.459	91.8473
446.941	91.7721
447.423	91.6948
447.905	91.6354
448.388	91.6072
448.87	91.6153
449.352	91.6601
449.834	91.7393
450.316	91.8493
450.798	91.983
451.28	92.1253
451.762	92.2499
452.245	92.3221
452.727	92.3106
453.209	92.202
453.691	92.009
454.173	91.766
454.655	91.5203
455.137	91.3228
455.62	91.2204
456.102	91.2473
456.584	91.4098
457.066	91.673
457.548	91.9623
458.03	92.1912
458.512	92.3027
458.995	92.2905
459.477	92.191
459.959	92.0569
460.441	91.9327
460.923	91.8414
461.405	91.7819
461.887	91.7333
462.37	91.6651
462.852	91.549
463.334	91.3703
463.816	91.1337
464.298	90.8615
464.78	90.5868
465.262	90.3456
465.745	90.1721
466.227	90.0962
466.709	90.1382
467.191	90.3027
467.673	90.5707
468.155	90.9012
468.637	91.2417
469.119	91.5457
469.602	91.7837
470.084	91.9469
470.566	92.0427
471.048	92.0871
471.53	92.0974
472.012	92.0849
472.494	92.0528
472.977	91.998
473.459	91.9191
473.941	91.8219
474.423	91.7204
474.905	91.6322
475.387	91.5726
475.869	91.5491
476.351	91.5593
476.834	91.5937
477.316	91.6402
477.798	91.691
478.28	91.7448
478.762	91.8061
479.244	91.8787
479.726	91.9592
480.209	92.034
480.691	92.0819
481.173	92.0813
481.655	92.0201
482.137	91.902
482.619	91.749
483.101	91.5959
483.584	91.4794
484.066	91.4261
484.548	91.4452
485.03	91.53
485.512	91.6659
485.994	91.8401
486.476	92.0461
486.959	92.2826
487.441	92.5462
487.923	92.8249
488.405	93.0941
488.887	93.3188
489.369	93.4597
489.851	93.4848
490.334	93.3802
490.816	93.1584
491.298	92.8577
491.78	92.5332
492.262	92.2408
492.744	92.0224
493.226	91.8973
493.709	91.8622
494.191	91.8967
494.673	91.9714
495.155	92.0565
495.637	92.1276
496.119	92.1684
496.601	92.1721
497.083	92.1406
497.566	92.0834
498.048	92.015
498.53	91.9524
499.012	91.9115
499.494	91.9048
499.976	91.9402
500.458	92.0204
500.94	92.1413
501.423	92.2911
501.905	92.4497
502.387	92.5926
502.869	92.698
503.351	92.7538
503.833	92.7606
504.315	92.7293
504.798	92.6753
505.28	92.6135
505.762	92.554
506.244	92.4996
506.726	92.4461
507.208	92.3856
507.69	92.3125
508.173	92.2285
508.655	92.1438
509.137	92.0741
509.619	92.0345
510.101	92.0332
510.583	92.0663
511.065	92.1189
511.548	92.17
512.03	92.2004
512.512	92.2002
512.994	92.1714
513.476	92.1247
513.958	92.0744
514.44	92.0313
514.923	91.9998
515.405	91.9781
515.887	91.9623
516.369	91.951
516.851	91.9472
517.333	91.9559
517.815	91.9778
518.297	92.0038
518.78	92.0146
519.262	91.9878
519.744	91.9082
520.226	91.7775
520.708	91.6159
521.19	91.4572
521.672	91.3365
522.154	91.2774
522.637	91.2839
523.119	91.3396
523.601	91.4144
524.083	91.476
524.565	91.5011
525.047	91.4844
525.529	91.4409
526.012	91.3981
526.494	91.3828
526.976	91.4081
527.458	91.4702
527.94	91.5528
528.422	91.6365
528.904	91.7056
529.387	91.7512
529.869	91.7702
530.351	91.7621
530.833	91.7268
531.315	91.6636
531.797	91.5734
532.279	91.4624
532.761	91.3431
533.244	91.2336
533.726	91.1532
534.208	91.1159
534.69	91.1261
535.172	91.1777
535.654	91.2569
536.136	91.3472
536.619	91.4347
537.101	91.5103
537.583	91.5694
538.065	91.6091
538.547	91.6263
539.029	91.6164
539.511	91.5759
539.994	91.5052
540.476	91.4112
540.958	91.3073
541.44	91.2105
541.922	91.1356
542.404	91.092
542.886	91.0816
543.369	91.1009
543.851	91.1445
544.333	91.2078
544.815	91.2882
545.297	91.3832
545.779	91.4881
546.261	91.5941
546.744	91.6892
547.226	91.7612
547.708	91.8017
548.19	91.8093
548.672	91.7898
549.154	91.7536
549.636	91.7108
550.119	91.6676
550.601	91.6245
551.083	91.5788
551.565	91.5276
552.047	91.4726
552.529	91.4205
553.011	91.3813
553.494	91.3644
553.976	91.3731
554.458	91.4028
554.94	91.4415
555.422	91.4735
555.904	91.4841
556.386	91.4641
556.868	91.4117
557.351	91.3317
557.833	91.2326
558.315	91.1244
558.797	91.0175
559.279	90.9219
559.761	90.8478
560.243	90.8051
560.726	90.8011
561.208	90.8381
561.69	90.9123
562.172	91.013
562.654	91.126
563.136	91.2357
563.618	91.3297
564.101	91.4002
564.583	91.4445
565.065	91.4632
565.547	91.4574
566.029	91.4277
566.511	91.374
566.993	91.2977
567.476	91.2041
567.958	91.1039
568.44	91.0108
568.922	90.9387
569.404	90.8963
569.886	90.8852
570.368	90.9001
570.85	90.9315
571.332	90.9691
571.815	91.0056
572.297	91.0374
572.779	91.0646
573.261	91.088
573.743	91.1076
574.225	91.1207
574.707	91.1227
575.19	91.1085
575.672	91.0752
576.154	91.0241
576.636	90.96
577.118	90.8907
577.6	90.8235
578.082	90.7645
578.565	90.7181
579.047	90.6879
579.529	90.677
580.011	90.6882
580.493	90.7226
580.975	90.7791
581.457	90.8524
581.94	90.9341
582.422	91.013
582.904	91.0768
583.386	91.1145
583.868	91.1183
584.35	91.085
584.832	91.0178
585.314	90.9257
585.797	90.8226
586.279	90.7249
586.761	90.6482
587.243	90.6044
587.725	90.5988
588.207	90.63
588.689	90.6906
589.172	90.7695
589.654	90.8548
590.136	90.9364
590.618	91.0068
591.1	91.0618
591.582	91.0995
592.064	91.1197
592.547	91.1225
593.029	91.1084
593.511	91.079
593.993	91.0372
594.475	90.9881
594.957	90.9383
595.439	90.8946
595.922	90.8622
596.404	90.844
596.886	90.8399
597.368	90.8481
597.85	90.8656
598.332	90.8898
598.814	90.9187
599.297	90.9497
599.779	90.979
600.261	91.0016
600.743	91.011
601.225	91.0017
601.707	90.9707
602.189	90.9188
602.671	90.8509
603.154	90.7751
603.636	90.7007
604.118	90.6364
604.6	90.5886
605.082	90.561
605.564	90.5547
606.046	90.5689
606.529	90.6012
607.011	90.6484
607.493	90.7065
607.975	90.7707
608.457	90.8353
608.939	90.8947
609.421	90.9438
609.904	90.9786
610.386	90.9967
610.868	90.9968
611.35	90.9793
611.832	90.9454
612.314	90.8981
612.796	90.842
613.278	90.7834
613.761	90.7301
614.243	90.6902
614.725	90.6703
615.207	90.6748
615.689	90.7042
616.171	90.7553
616.653	90.8221
617.136	90.8968
617.618	90.9715
618.1	91.0397
618.582	91.0965
619.064	91.1392
619.546	91.1663
620.028	91.1782
620.51	91.1765
620.993	91.1641
621.475	91.1456
621.957	91.126
622.439	91.1099
622.921	91.1015
623.403	91.1034
623.885	91.1173
624.368	91.1441
624.85	91.1846
625.332	91.239
625.814	91.3061
626.296	91.3827
626.778	91.463
627.26	91.5391
627.743	91.6021
628.225	91.6443
628.707	91.6606
629.189	91.6501
629.671	91.6165
630.153	91.5673
630.635	91.5123
631.118	91.462
631.6	91.4257
632.082	91.4111
632.564	91.4233
633.046	91.465
633.528	91.5354
634.01	91.6301
634.492	91.7415
634.975	91.8589
635.457	91.9708
635.939	92.0668
636.421	92.1396
636.903	92.1866
637.385	92.2095
637.867	92.2135
638.35	92.2054
638.832	92.192
639.314	92.1791
639.796	92.1714
640.278	92.1724
640.76	92.1847
641.242	92.2095
641.725	92.2467
642.207	92.294
642.689	92.347
643.171	92.4005
643.653	92.4491
644.135	92.4893
644.617	92.5203
645.1	92.5436
645.582	92.5623
646.064	92.5788
646.546	92.5933
647.028	92.6031
647.51	92.6039
647.992	92.5911
648.475	92.5632
648.957	92.5225
649.439	92.4759
649.921	92.433
650.403	92.4034
650.885	92.3944
651.367	92.4092
651.849	92.4464
652.332	92.4999
652.814	92.5614
653.296	92.6213
653.778	92.6709
654.26	92.704
654.742	92.7174
655.224	92.7112
655.707	92.6886
656.189	92.6549
656.671	92.6164
657.153	92.5785
657.635	92.5451
658.117	92.5174
658.599	92.495
659.082	92.4761
659.564	92.4597
660.046	92.4453
660.528	92.4338
661.01	92.4265
661.492	92.4247
661.974	92.4283
662.457	92.4361
662.939	92.4462
663.421	92.4563
663.903	92.4651
664.385	92.4722
664.867	92.4779
665.349	92.4822
665.831	92.4846
666.313	92.4825
666.796	92.472
667.278	92.4485
667.76	92.4107
668.242	92.3651
668.724	92.3253
669.206	92.3039
669.688	92.3055
670.171	92.3281
670.653	92.3672
671.135	92.4179
671.617	92.4757
672.099	92.5352
672.581	92.5902
673.063	92.634
673.546	92.6609
674.028	92.6683
674.51	92.6578
674.992	92.6356
675.474	92.6108
675.956	92.594
676.438	92.5944
676.921	92.6177
677.403	92.6647
677.885	92.7315
678.367	92.8106
678.849	92.8933
679.331	92.9714
679.813	93.0386
680.295	93.0915
680.778	93.1291
681.26	93.1528
681.742	93.165
682.224	93.1687
682.706	93.1665
683.188	93.1606
683.67	93.1525
684.153	93.1428
684.635	93.1319
685.117	93.12
685.599	93.1075
686.081	93.0958
686.563	93.0873
687.045	93.085
687.528	93.0922
688.01	93.1104
688.492	93.139
688.974	93.1741
689.456	93.2095
689.938	93.2382
690.42	93.2535
690.903	93.2512
691.385	93.2294
691.867	93.1888
692.349	93.1323
692.831	93.0637
693.313	92.9877
693.795	92.909
694.278	92.832
694.76	92.7604
695.242	92.6965
695.724	92.6396
696.206	92.5866
696.688	92.532
697.17	92.4708
697.653	92.4009
698.135	92.3256
698.617	92.2549
699.099	92.2032
699.581	92.1858
700.063	92.2135
700.545	92.2891
701.027	92.4055
701.51	92.5472
701.992	92.6949
702.474	92.8293
702.956	92.9359
703.438	93.0067
703.92	93.0409
704.402	93.0426
704.885	93.0185
705.367	92.9747
705.849	92.9162
706.331	92.8463
706.813	92.7666
707.295	92.6769
707.777	92.5748
708.26	92.4545
708.742	92.3073
709.224	92.1229
709.706	91.894
710.188	91.6197
710.67	91.3106
711.152	90.9896
711.635	90.6895
712.117	90.4471
712.599	90.2956
713.081	90.2573
713.563	90.3393
714.045	90.5315
714.527	90.8093
715.009	91.1379
715.491	91.4802
715.974	91.803
716.456	92.0831
716.938	92.309
717.42	92.4799
717.902	92.6036
718.384	92.6925
718.866	92.7603
719.349	92.8199
719.831	92.8814
720.313	92.9514
720.795	93.0333
721.277	93.1282
721.759	93.2361
722.241	93.3561
722.724	93.4875
723.206	93.6295
723.688	93.7807
724.17	93.9388
724.652	94.1002
725.134	94.2606
725.616	94.4156
726.099	94.5612
726.581	94.6952
727.063	94.8174
727.545	94.9289
728.027	95.0316
728.509	95.1269
728.991	95.2149
729.473	95.2948
729.956	95.3658
730.438	95.4275
730.92	95.4812
731.402	95.5296
731.884	95.5763
732.366	95.6245
732.848	95.6763
733.331	95.732
733.813	95.7899
734.295	95.8466
734.777	95.8982
735.259	95.9402
735.741	95.9687
736.223	95.9804
736.706	95.9741
737.188	95.9507
737.67	95.9141
738.152	95.8713
738.634	95.8309
739.116	95.8018
739.598	95.7912
740.081	95.8028
740.563	95.8364
741.045	95.8884
741.527	95.9533
742.009	96.0249
742.491	96.0984
742.973	96.1708
743.456	96.2408
743.938	96.308
744.42	96.3725
744.902	96.4341
745.384	96.4924
745.866	96.5471
746.348	96.5984
746.83	96.6465
747.313	96.6912
747.795	96.7322
748.277	96.7687
748.759	96.8002
749.241	96.8274
749.723	96.8527
750.205	96.8799
750.688	96.9137
751.17	96.9576
751.652	97.0124
752.134	97.0757
752.616	97.1421
753.098	97.2041
753.58	97.2547
754.062	97.2885
754.545	97.303
755.027	97.2987
755.509	97.2781
755.991	97.245
756.473	97.2039
756.955	97.1599
757.438	97.1181
757.92	97.0836
758.402	97.0605
758.884	97.0508
759.366	97.0538
759.848	97.0659
760.33	97.0811
760.812	97.0926
761.295	97.0943
761.777	97.0819
762.259	97.0538
762.741	97.0106
763.223	96.9548
763.705	96.8894
764.187	96.818
764.67	96.7445
765.152	96.6728
765.634	96.6067
766.116	96.5489
766.598	96.5008
767.08	96.4617
767.562	96.4295
768.044	96.4017
768.527	96.3763
769.009	96.3533
769.491	96.3344
769.973	96.3229
770.455	96.3218
770.937	96.3327
771.419	96.3543
771.902	96.383
772.384	96.4136
772.866	96.4404
773.348	96.46
773.83	96.4711
774.312	96.4758
774.794	96.4781
775.277	96.4834
775.759	96.4972
776.241	96.524
776.723	96.5672
777.205	96.6281
777.687	96.7054
778.169	96.7957
778.652	96.8933
779.134	96.9908
779.616	97.0807
780.098	97.1561
780.58	97.2128
781.062	97.2493
781.544	97.2673
782.027	97.2704
782.509	97.2634
782.991	97.2509
783.473	97.2373
783.955	97.2265
784.437	97.222
784.919	97.227
785.401	97.2436
785.884	97.2725
786.366	97.3123
786.848	97.3602
787.33	97.4122
787.812	97.4646
788.294	97.5153
788.776	97.5639
789.259	97.6115
789.741	97.6593
790.223	97.7079
790.705	97.756
791.187	97.8011
791.669	97.84
792.151	97.8706
792.634	97.8928
793.116	97.9085
793.598	97.9215
794.08	97.9359
794.562	97.9556
795.044	97.9835
795.526	98.022
796.008	98.0726
796.491	98.1363
796.973	98.2128
797.455	98.2992
797.937	98.3899
798.419	98.4768
798.901	98.5505
799.383	98.603
799.865	98.63
800.348	98.6325
800.83	98.6168
801.312	98.5921
801.794	98.5684
802.276	98.554
802.758	98.5541
803.24	98.5707
803.723	98.6034
804.205	98.6501
804.687	98.7077
805.169	98.772
805.651	98.838
806.133	98.8997
806.615	98.9515
807.098	98.9889
807.58	99.0103
808.062	99.0173
808.544	99.0141
809.026	99.0059
809.508	98.9971
809.99	98.9895
810.472	98.9828
810.955	98.9756
811.437	98.9665
811.919	98.9557
812.401	98.9455
812.883	98.9392
813.365	98.9407
813.847	98.9528
814.33	98.9765
814.812	99.0114
815.294	99.0553
815.776	99.1049
816.258	99.156
816.74	99.2029
817.222	99.2395
817.705	99.2594
818.187	99.2579
818.669	99.2336
819.151	99.1896
819.633	99.1338
820.115	99.077
820.597	99.0303
821.08	99.0024
821.562	98.9983
822.044	99.0178
822.526	99.0573
823.008	99.1108
823.49	99.1715
823.972	99.2325
824.455	99.2876
824.937	99.3311
825.419	99.358
825.901	99.3649
826.383	99.3512
826.865	99.3199
827.347	99.2775
827.83	99.2326
828.312	99.1934
828.794	99.1659
829.276	99.152
829.758	99.1501
830.24	99.1561
830.722	99.165
831.205	99.1733
831.687	99.1792
832.169	99.1825
832.651	99.1841
833.133	99.1844
833.615	99.1831
834.097	99.1792
834.579	99.1707
835.062	99.1553
835.544	99.1304
836.026	99.0931
836.508	99.0402
836.99	98.9692
837.472	98.8788
837.954	98.7705
838.437	98.6481
838.919	98.5176
839.401	98.3849
839.883	98.255
840.365	98.1306
840.847	98.0126
841.329	97.9017
841.812	97.7997
842.294	97.7095
842.776	97.6347
843.258	97.5768
843.74	97.5329
844.222	97.4942
844.704	97.4468
845.187	97.3751
845.669	97.2658
846.151	97.1122
846.633	96.9158
847.115	96.6854
847.597	96.4332
848.079	96.1702
848.561	95.9025
849.043	95.6288
849.526	95.3422
850.008	95.0315
850.49	94.6857
850.972	94.2966
851.454	93.8607
851.936	93.3813
852.418	92.8678
852.901	92.3351
853.383	91.803
853.865	91.2927
854.347	90.8245
854.829	90.415
855.311	90.075
855.793	89.8096
856.276	89.6191
856.758	89.5002
857.24	89.448
857.722	89.457
858.204	89.5219
858.686	89.638
859.168	89.8002
859.651	90.0031
860.133	90.2393
860.615	90.4991
861.097	90.7704
861.579	91.0394
862.061	91.2926
862.543	91.5187
863.025	91.7099
863.508	91.8624
863.99	91.9767
864.472	92.0558
864.954	92.1043
865.436	92.1268
865.918	92.1261
866.4	92.1018
866.883	92.0498
867.365	91.9624
867.847	91.8289
868.329	91.6389
868.811	91.3841
869.293	91.0615
869.775	90.6751
870.258	90.236
870.74	89.7616
871.222	89.2741
871.704	88.7978
872.186	88.3569
872.668	87.9723
873.15	87.6597
873.633	87.4276
874.115	87.2773
874.597	87.2046
875.079	87.2026
875.561	87.2643
876.043	87.3846
876.525	87.5613
877.008	87.7942
877.49	88.0843
877.972	88.4312
878.454	88.8325
878.936	89.282
879.418	89.7695
879.9	90.2806
880.382	90.7987
880.865	91.3069
881.347	91.7904
881.829	92.2387
882.311	92.6465
882.793	93.0135
883.275	93.3434
883.757	93.6427
884.24	93.9198
884.722	94.184
885.204	94.4446
885.686	94.7091
886.168	94.9814
886.65	95.2608
887.132	95.5409
887.615	95.8106
888.097	96.0565
888.579	96.2664
889.061	96.432
889.543	96.5518
890.025	96.6303
890.507	96.6767
890.989	96.7029
891.472	96.721
891.954	96.7414
892.436	96.7728
892.918	96.8208
893.4	96.8885
893.882	96.9761
894.364	97.0812
894.847	97.199
895.329	97.3234
895.811	97.4485
896.293	97.5701
896.775	97.6863
897.257	97.7979
897.739	97.9072
898.221	98.0164
898.704	98.1268
899.186	98.2378
899.668	98.3477
900.15	98.4546
900.632	98.5569
901.114	98.6544
901.596	98.7473
902.079	98.8366
902.561	98.9227
903.043	99.0063
903.525	99.0888
904.007	99.1726
904.489	99.2609
904.971	99.3572
905.454	99.4628
905.936	99.5761
906.418	99.6912
906.9	99.7992
907.382	99.8902
907.864	99.956
908.346	99.9923
908.829	100
909.311	99.984
909.793	99.952
910.275	99.9123
910.757	99.8725
911.239	99.8389
911.721	99.816
912.203	99.8066
912.686	99.8109
913.168	99.8259
913.65	99.8453
914.132	99.8598
914.614	99.8589
915.096	99.8332
915.578	99.777
916.061	99.6896
916.543	99.5751
917.025	99.4405
917.507	99.2931
917.989	99.1389
918.471	98.9814
918.953	98.8217
919.436	98.6597
919.918	98.4949
920.4	98.3267
920.882	98.1546
921.364	97.9778
921.846	97.7953
922.328	97.6066
922.811	97.4129
923.293	97.2166
923.775	97.0222
924.257	96.8341
924.739	96.6548
925.221	96.484
925.703	96.3178
926.186	96.1502
926.668	95.9749
927.15	95.7881
927.632	95.5904
928.114	95.3872
928.596	95.1877
929.078	95.0029
929.56	94.8438
930.043	94.7191
930.525	94.6348
931.007	94.5933
931.489	94.5934
931.971	94.6308
932.453	94.6981
932.935	94.7858
933.418	94.8833
933.9	94.98
934.382	95.068
934.864	95.1429
935.346	95.2054
935.828	95.2607
936.31	95.3164
936.793	95.3809
937.275	95.4606
937.757	95.5584
938.239	95.6739
938.721	95.8032
939.203	95.9411
939.685	96.0815
940.167	96.219
940.65	96.3482
941.132	96.4647
941.614	96.5651
942.096	96.6472
942.578	96.7105
943.06	96.7565
943.542	96.7878
944.024	96.8067
944.507	96.8142
944.989	96.809
945.471	96.788
945.953	96.7475
946.435	96.6849
946.917	96.6002
947.399	96.4963
947.882	96.3786
948.364	96.2536
948.846	96.1276
949.328	96.0059
949.81	95.8918
950.292	95.7867
950.774	95.6898
951.257	95.5983
951.739	95.5068
952.221	95.4077
952.703	95.2928
953.185	95.1542
953.667	94.9866
954.149	94.7892
954.632	94.5659
955.114	94.3251
955.596	94.0769
956.078	93.8315
956.56	93.5969
957.042	93.3775
957.524	93.1744
958.006	92.9857
958.489	92.8072
958.971	92.6341
959.453	92.4611
959.935	92.2835
960.417	92.0975
960.899	91.9013
961.381	91.695
961.864	91.4807
962.346	91.2624
962.828	91.045
963.31	90.8326
963.792	90.6284
964.274	90.4337
964.756	90.248
965.239	90.0699
965.721	89.8978
966.203	89.7308
966.685	89.569
967.167	89.4137
967.649	89.2674
968.131	89.1329
968.614	89.0129
969.096	88.9093
969.578	88.8222
970.06	88.7499
970.542	88.6882
971.024	88.6313
971.506	88.5719
971.989	88.5028
972.471	88.4183
972.953	88.315
973.435	88.193
973.917	88.0559
974.399	87.9097
974.881	87.7617
975.364	87.6189
975.846	87.4866
976.328	87.3675
976.81	87.2609
977.292	87.1635
977.774	87.0696
978.256	86.9721
978.738	86.8641
979.221	86.7395
979.703	86.5946
980.185	86.4287
980.667	86.2439
981.149	86.0449
981.631	85.8383
982.113	85.6307
982.596	85.4281
983.078	85.2345
983.56	85.0517
984.042	84.8794
984.524	84.7157
985.006	84.5576
985.488	84.4022
985.971	84.2469
986.453	84.0902
986.935	83.9323
987.417	83.7743
987.899	83.6185
988.381	83.4672
988.863	83.3221
989.346	83.1837
989.828	83.051
990.31	82.9215
990.792	82.7919
991.274	82.6589
991.756	82.5194
992.238	82.3717
992.72	82.2154
993.202	82.0517
993.685	81.8834
994.167	81.7144
994.649	81.5492
995.131	81.3921
995.613	81.2461
996.095	81.1119
996.577	80.988
997.06	80.8699
997.542	80.752
998.024	80.6284
998.506	80.4944
998.988	80.3476
999.47	80.1881
999.952	80.0179
1000.43	79.8404
1000.92	79.6593
1001.4	79.478
1001.88	79.299
1002.36	79.1244
1002.85	78.9557
1003.33	78.793
1003.81	78.6358
1004.29	78.4817
1004.77	78.3276
1005.26	78.1701
1005.74	78.0064
1006.22	77.8358
1006.7	77.6594
1007.18	77.4799
1007.67	77.3003
1008.15	77.1227
1008.63	76.9471
1009.11	76.7717
1009.6	76.5937
1010.08	76.4106
1010.56	76.2211
1011.04	76.0257
1011.52	75.8258
1012.01	75.6232
1012.49	75.4194
1012.97	75.2153
1013.45	75.0119
1013.93	74.8111
1014.42	74.6159
1014.9	74.4297
1015.38	74.2551
1015.86	74.0927
1016.35	73.94
1016.83	73.7922
1017.31	73.6436
1017.79	73.4901
1018.27	73.3301
1018.76	73.1653
1019.24	72.9996
1019.72	72.8373
1020.2	72.6816
1020.68	72.534
1021.17	72.3946
1021.65	72.2633
1022.13	72.1401
1022.61	72.0255
1023.1	71.9196
1023.58	71.8214
1024.06	71.728
1024.54	71.6358
1025.02	71.541
1025.51	71.4424
1025.99	71.3412
1026.47	71.2407
1026.95	71.1453
1027.43	71.0579
1027.92	70.9789
1028.4	70.9062
1028.88	70.8364
1029.36	70.7663
1029.85	70.6944
1030.33	70.6211
1030.81	70.5473
1031.29	70.4741
1031.77	70.4015
1032.26	70.3288
1032.74	70.256
1033.22	70.185
1033.7	70.1196
1034.18	70.0646
1034.67	70.0241
1035.15	69.9992
1035.63	69.9872
1036.11	69.9826
1036.6	69.9788
1037.08	69.971
1037.56	69.9571
1038.04	69.9386
1038.52	69.9182
1039.01	69.8986
1039.49	69.8804
1039.97	69.8626
1040.45	69.8434
1040.93	69.8217
1041.42	69.7984
1041.9	69.7758
1042.38	69.756
1042.86	69.7399
1043.35	69.7258
1043.83	69.71
1044.31	69.689
1044.79	69.6607
1045.27	69.6266
1045.76	69.5905
1046.24	69.5574
1046.72	69.5307
1047.2	69.5114
1047.68	69.4977
1048.17	69.4861
1048.65	69.4736
1049.13	69.4589
1049.61	69.4423
1050.1	69.4248
1050.58	69.4067
1051.06	69.3865
1051.54	69.3622
1052.02	69.3318
1052.51	69.2961
1052.99	69.258
1053.47	69.2226
1053.95	69.1946
1054.43	69.1762
1054.92	69.1655
1055.4	69.1579
1055.88	69.1475
1056.36	69.1302
1056.85	69.1048
1057.33	69.0739
1057.81	69.0411
1058.29	69.0098
1058.77	68.9811
1059.26	68.954
1059.74	68.9267
1060.22	68.8988
1060.7	68.8722
1061.18	68.8507
1061.67	68.8382
1062.15	68.8364
1062.63	68.8436
1063.11	68.8546
1063.6	68.8636
1064.08	68.8658
1064.56	68.8601
1065.04	68.8486
1065.52	68.8354
1066.01	68.8243
1066.49	68.8165
1066.97	68.8109
1067.45	68.8046
1067.93	68.7953
1068.42	68.7825
1068.9	68.7674
1069.38	68.7519
1069.86	68.7373
1070.34	68.7225
1070.83	68.7056
1071.31	68.6844
1071.79	68.6592
1072.27	68.6332
1072.76	68.612
1073.24	68.6013
1073.72	68.6042
1074.2	68.6199
1074.68	68.6439
1075.17	68.6702
1075.65	68.6941
1076.13	68.7137
1076.61	68.7304
1077.09	68.7464
1077.58	68.7629
1078.06	68.778
1078.54	68.7873
1079.02	68.7861
1079.51	68.773
1079.99	68.7517
1080.47	68.732
1080.95	68.7276
1081.43	68.7526
1081.92	68.8174
1082.4	68.9267
1082.88	69.079
1083.36	69.2679
1083.84	69.484
1084.33	69.7169
1084.81	69.956
1085.29	70.1913
1085.77	70.4141
1086.26	70.6185
1086.74	70.8025
1087.22	70.9681
1087.7	71.1206
1088.18	71.2669
1088.67	71.4127
1089.15	71.5609
1089.63	71.7107
1090.11	71.8584
1090.59	71.9999
1091.08	72.1326
1091.56	72.257
1092.04	72.3757
1092.52	72.4923
1093.01	72.6098
1093.49	72.7287
1093.97	72.8478
1094.45	72.9651
1094.93	73.0785
1095.42	73.1875
1095.9	73.2927
1096.38	73.3946
1096.86	73.4933
1097.34	73.5876
1097.83	73.676
1098.31	73.7575
1098.79	73.8329
1099.27	73.9049
1099.76	73.9771
1100.24	74.0526
1100.72	74.1326
1101.2	74.2157
1101.68	74.2983
1102.17	74.3765
1102.65	74.4478
1103.13	74.5113
1103.61	74.5683
1104.09	74.6207
1104.58	74.6702
1105.06	74.7176
1105.54	74.7627
1106.02	74.8054
1106.51	74.8465
1106.99	74.8877
1107.47	74.9312
1107.95	74.9788
1108.43	75.0308
1108.91	75.0855
1109.4	75.1407
1109.88	75.1943
1110.36	75.2459
1110.84	75.297
1111.33	75.3507
1111.81	75.4097
1112.29	75.4762
1112.77	75.5502
1113.26	75.6305
1113.74	75.7153
1114.22	75.8036
1114.7	75.8951
1115.18	75.9901
1115.66	76.0887
1116.15	76.1896
1116.63	76.2907
1117.11	76.3893
1117.59	76.4834
1118.08	76.5723
1118.56	76.6574
1119.04	76.7409
1119.52	76.8247
1120.01	76.9096
1120.49	76.9946
1120.97	77.0776
1121.45	77.1564
1121.93	77.2294
1122.41	77.2965
1122.9	77.3585
1123.38	77.4166
1123.86	77.4718
1124.34	77.5241
1124.83	77.5733
1125.31	77.6194
1125.79	77.6633
1126.27	77.7067
1126.76	77.7519
1127.24	77.8008
1127.72	77.8545
1128.2	77.9125
1128.68	77.9737
1129.16	78.0366
1129.65	78.1002
1130.13	78.1638
1130.61	78.2275
1131.09	78.2913
1131.58	78.3551
1132.06	78.4184
1132.54	78.4806
1133.02	78.5416
1133.5	78.6018
1133.99	78.6615
1134.47	78.7208
1134.95	78.7786
1135.43	78.8327
1135.91	78.8803
1136.4	78.9186
1136.88	78.946
1137.36	78.9625
1137.84	78.9695
1138.33	78.9691
1138.81	78.9633
1139.29	78.9534
1139.77	78.9395
1140.25	78.9215
1140.74	78.8991
1141.22	78.8725
1141.7	78.8425
1142.18	78.8102
1142.66	78.7759
1143.15	78.7394
1143.63	78.6999
1144.11	78.6563
1144.59	78.6082
1145.08	78.5561
1145.56	78.5013
1146.04	78.4454
1146.52	78.3895
1147	78.3335
1147.49	78.2764
1147.97	78.2168
1148.45	78.1539
1148.93	78.0882
1149.41	78.0218
1149.9	77.9579
1150.38	77.8997
1150.86	77.8497
1151.34	77.8091
1151.83	77.7781
1152.31	77.7562
1152.79	77.7431
1153.27	77.7387
1153.75	77.7423
1154.24	77.7529
1154.72	77.7681
1155.2	77.7845
1155.68	77.7988
1156.16	77.8087
1156.65	77.8139
1157.13	77.8161
1157.61	77.8189
1158.09	77.826
1158.58	77.841
1159.06	77.8658
1159.54	77.9015
1160.02	77.9483
1160.5	78.0064
1160.99	78.0762
1161.47	78.1578
1161.95	78.251
1162.43	78.3543
1162.91	78.4658
1163.4	78.5829
1163.88	78.7039
1164.36	78.828
1164.84	78.9552
1165.33	79.0862
1165.81	79.2212
1166.29	79.3597
1166.77	79.5002
1167.25	79.6413
1167.74	79.782
1168.22	79.9226
1168.7	80.0643
1169.18	80.2087
1169.66	80.3573
1170.15	80.5105
1170.63	80.6678
1171.11	80.828
1171.59	80.9894
1172.08	81.1508
1172.56	81.3104
1173.04	81.4667
1173.52	81.6173
1174	81.7596
1174.49	81.8913
1174.97	82.011
1175.45	82.1191
1175.93	82.2178
1176.41	82.3104
1176.9	82.4012
1177.38	82.4937
1177.86	82.5911
1178.34	82.695
1178.83	82.8063
1179.31	82.925
1179.79	83.0504
1180.27	83.1808
1180.75	83.3137
1181.24	83.4455
1181.72	83.5721
1182.2	83.6898
1182.68	83.796
1183.16	83.8895
1183.65	83.9708
1184.13	84.0415
1184.61	84.1037
1185.09	84.1593
1185.58	84.2101
1186.06	84.2579
1186.54	84.3042
1187.02	84.3506
1187.5	84.3986
1187.99	84.4493
1188.47	84.5035
1188.95	84.5612
1189.43	84.6219
1189.91	84.685
1190.4	84.7497
1190.88	84.8152
1191.36	84.8805
1191.84	84.9441
1192.33	85.0039
1192.81	85.0575
1193.29	85.103
1193.77	85.1392
1194.25	85.1665
1194.74	85.1868
1195.22	85.203
1195.7	85.2182
1196.18	85.2358
1196.66	85.2584
1197.15	85.288
1197.63	85.3261
1198.11	85.3731
1198.59	85.4286
1199.08	85.4903
1199.56	85.5546
1200.04	85.6165
1200.52	85.6701
1201	85.7104
1201.49	85.7344
1201.97	85.7413
1202.45	85.7331
1202.93	85.7135
1203.41	85.6865
1203.9	85.656
1204.38	85.6252
1204.86	85.5965
1205.34	85.5715
1205.83	85.5519
1206.31	85.5388
1206.79	85.5332
1207.27	85.5345
1207.75	85.5417
1208.24	85.5524
1208.72	85.5643
1209.2	85.5755
1209.68	85.5845
1210.16	85.5907
1210.65	85.5934
1211.13	85.5916
1211.61	85.5836
1212.09	85.5672
1212.58	85.5407
1213.06	85.5037
1213.54	85.4577
1214.02	85.4056
1214.5	85.3518
1214.99	85.3005
1215.47	85.2551
1215.95	85.2178
1216.43	85.1894
1216.91	85.1696
1217.4	85.1574
1217.88	85.151
1218.36	85.1479
1218.84	85.1449
1219.33	85.1379
1219.81	85.1232
1220.29	85.0975
1220.77	85.0594
1221.25	85.0094
1221.74	84.9503
1222.22	84.8858
1222.7	84.8199
1223.18	84.7563
1223.66	84.6976
1224.15	84.6453
1224.63	84.6003
1225.11	84.5632
1225.59	84.534
1226.08	84.5121
1226.56	84.4964
1227.04	84.4846
1227.52	84.4737
1228	84.4605
1228.48	84.4426
1228.97	84.4182
1229.45	84.3871
1229.93	84.3499
1230.41	84.3077
1230.9	84.2618
1231.38	84.213
1231.86	84.1625
1232.34	84.1113
1232.83	84.0611
1233.31	84.0139
1233.79	83.9717
1234.27	83.9363
1234.75	83.9086
1235.23	83.8887
1235.72	83.8757
1236.2	83.8683
1236.68	83.865
1237.16	83.8641
1237.65	83.8635
1238.13	83.8611
1238.61	83.8541
1239.09	83.8397
1239.58	83.8157
1240.06	83.7815
1240.54	83.738
1241.02	83.688
1241.5	83.6357
1241.98	83.5854
1242.47	83.5414
1242.95	83.5064
1243.43	83.4819
1243.91	83.468
1244.4	83.4633
1244.88	83.4656
1245.36	83.472
1245.84	83.4791
1246.33	83.4836
1246.81	83.483
1247.29	83.4754
1247.77	83.4606
1248.25	83.44
1248.73	83.4159
1249.22	83.3912
1249.7	83.3683
1250.18	83.349
1250.66	83.3337
1251.15	83.3224
1251.63	83.3145
1252.11	83.3101
1252.59	83.3092
1253.07	83.3121
1253.56	83.3191
1254.04	83.3301
1254.52	83.3446
1255	83.3618
1255.48	83.381
1255.97	83.4019
1256.45	83.4243
1256.93	83.4477
1257.41	83.4712
1257.9	83.4928
1258.38	83.51
1258.86	83.5203
1259.34	83.5224
1259.82	83.5166
1260.31	83.5054
1260.79	83.4927
1261.27	83.4827
1261.75	83.4791
1262.23	83.4843
1262.72	83.499
1263.2	83.5231
1263.68	83.5552
1264.16	83.5934
1264.65	83.6353
1265.13	83.6776
1265.61	83.7173
1266.09	83.7511
1266.57	83.7774
1267.06	83.796
1267.54	83.8087
1268.02	83.8189
1268.5	83.8304
1268.98	83.8464
1269.47	83.8687
1269.95	83.8975
1270.43	83.9316
1270.91	83.969
1271.4	84.0078
1271.88	84.0463
1272.36	84.0833
1272.84	84.1182
1273.32	84.1506
1273.81	84.1805
1274.29	84.2085
1274.77	84.2358
1275.25	84.2641
1275.73	84.2948
1276.22	84.3288
1276.7	84.3651
1277.18	84.4017
1277.66	84.4352
1278.15	84.4629
1278.63	84.483
1279.11	84.4959
1279.59	84.5035
1280.07	84.5091
1280.56	84.516
1281.04	84.527
1281.52	84.5435
1282	84.5663
1282.48	84.5953
1282.97	84.6299
1283.45	84.6694
1283.93	84.7121
1284.41	84.7556
1284.9	84.7969
1285.38	84.8328
1285.86	84.8609
1286.34	84.8805
1286.82	84.8926
1287.31	84.8996
1287.79	84.9045
1288.27	84.9094
1288.75	84.9156
1289.23	84.9228
1289.72	84.9297
1290.2	84.9353
1290.68	84.9386
1291.16	84.9389
1291.64	84.9362
1292.13	84.9299
1292.61	84.9196
1293.09	84.9053
1293.57	84.8876
1294.06	84.8684
1294.54	84.85
1295.02	84.835
1295.5	84.8246
1295.98	84.8182
1296.47	84.8133
1296.95	84.8062
1297.43	84.7931
1297.91	84.7718
1298.39	84.7418
1298.88	84.7046
1299.36	84.6629
1299.84	84.6191
1300.32	84.5752
1300.81	84.5326
1301.29	84.4922
1301.77	84.4546
1302.25	84.4206
1302.73	84.3906
1303.22	84.3639
1303.7	84.339
1304.18	84.3134
1304.66	84.2842
1305.14	84.2496
1305.63	84.2092
1306.11	84.1645
1306.59	84.1183
1307.07	84.0737
1307.56	84.0326
1308.04	83.996
1308.52	83.9634
1309	83.9335
1309.48	83.9052
1309.97	83.8776
1310.45	83.8502
1310.93	83.8225
1311.41	83.7935
1311.89	83.762
1312.38	83.7273
1312.86	83.6897
1313.34	83.6514
1313.82	83.6161
1314.31	83.588
1314.79	83.5698
1315.27	83.5621
1315.75	83.5629
1316.23	83.5683
1316.72	83.5735
1317.2	83.5744
1317.68	83.5685
1318.16	83.5553
1318.64	83.5359
1319.13	83.5123
1319.61	83.4866
1320.09	83.461
1320.57	83.4378
1321.06	83.4191
1321.54	83.4071
1322.02	83.4032
1322.5	83.4073
1322.98	83.4173
1323.47	83.4295
1323.95	83.4391
1324.43	83.4423
1324.91	83.437
1325.39	83.4233
1325.88	83.4034
1326.36	83.3799
1326.84	83.3546
1327.32	83.3279
1327.81	83.2987
1328.29	83.2654
1328.77	83.2267
1329.25	83.1821
1329.73	83.1321
1330.22	83.0773
1330.7	83.0186
1331.18	82.956
1331.66	82.8903
1332.14	82.8226
1332.63	82.7552
1333.11	82.6912
1333.59	82.6333
1334.07	82.5833
1334.56	82.541
1335.04	82.5044
1335.52	82.4702
1336	82.4354
1336.48	82.3974
1336.97	82.3555
1337.45	82.3094
1337.93	82.2592
1338.41	82.2042
1338.89	82.1435
1339.38	82.0765
1339.86	82.0052
1340.34	81.934
1340.82	81.8685
1341.31	81.8136
1341.79	81.7711
1342.27	81.7397
1342.75	81.7151
1343.23	81.6917
1343.72	81.664
1344.2	81.6285
1344.68	81.584
1345.16	81.5322
1345.64	81.4762
1346.13	81.419
1346.61	81.3623
1347.09	81.3063
1347.57	81.25
1348.06	81.1921
1348.54	81.1317
1349.02	81.0686
1349.5	81.003
1349.98	80.9353
1350.47	80.8655
1350.95	80.7938
1351.43	80.7205
1351.91	80.6467
1352.39	80.5738
1352.88	80.5031
1353.36	80.435
1353.84	80.3683
1354.32	80.3005
1354.81	80.2282
1355.29	80.1486
1355.77	80.0606
1356.25	79.9651
1356.73	79.8649
1357.22	79.7633
1357.7	79.6638
1358.18	79.5691
1358.66	79.4814
1359.14	79.4024
1359.63	79.3334
1360.11	79.2746
1360.59	79.2247
1361.07	79.1795
1361.56	79.1316
1362.04	79.0715
1362.52	78.9907
1363	78.8857
1363.48	78.7604
[truncated: 5,469 more rows]
