# Supplementary material for: Response surface optimization for cadmium biosorption onto the pre-treated biomass of red algae Digenia simplex as a sustainable indigenous biosorbent
Source: PeerJ journal article supplement (doi:10.7717/peerj.19776), 2025-08-04
Supplement: Supplementary_data.pdf [file Supplementary_data.pdf]

**Response surface optimization for cadmium biosorption onto the pre-treated biomass of red algae *Digenia simplex* as a sustainable indigenous biosorbent**  
**Sedky H. A. Hassan<sup>1</sup>, Maryam M. Alomran<sup>2\*</sup>, Nada I. A. Alsugiran<sup>2</sup>, Mostafa Koutb<sup>3</sup>, Hassan Ahmed<sup>4</sup> and Mustafa A. Fawzy<sup>4,5</sup>**

<sup>1</sup>Department of Biology, College of Science, Sultan Qaboos University, Muscat 123, Oman

<sup>2</sup>Department of Biology, College of Science, Princess Nourah bint Abdulrahman University, P.O. Box 84428, Riyadh 11671, Saudi Arabia

<sup>3</sup>Department of Biology, Faculty of Science, Umm Al-Qura University, Makkah 24381, Saudi Arabia

<sup>4</sup>Biology Department, Faculty of Science, Taif University, P.O. Box 11099, Taif 21944, Saudi Arabia

<sup>5</sup>Botany and Microbiology Department, Faculty of Science, Assiut University, Assiut 71516, Egypt

\*Correspondence: [mmalomran@pnu.edu.sa](mailto:mmalomran@pnu.edu.sa)

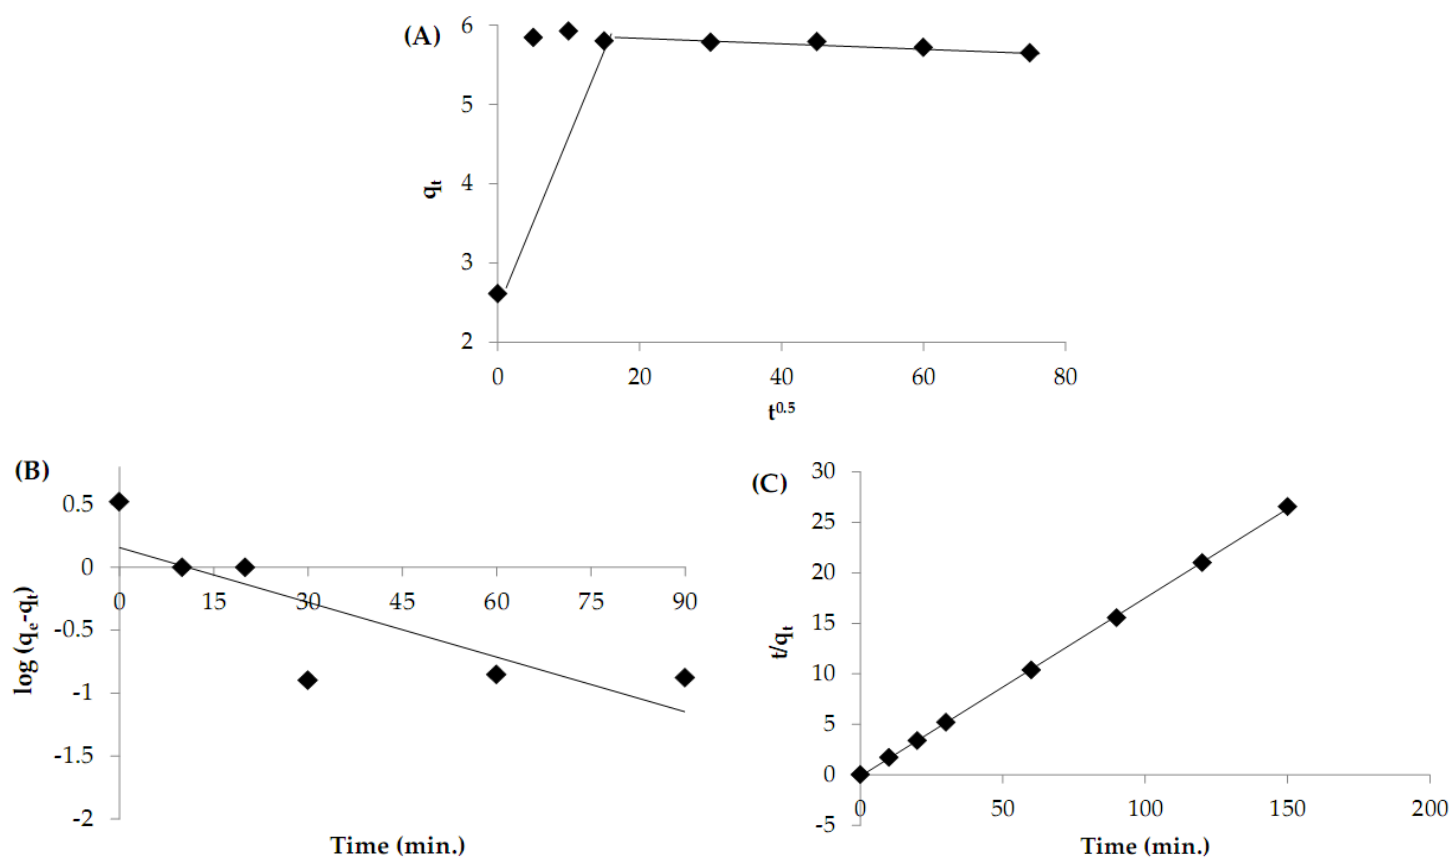

**Figure S1.** Graphs of A) intra-particle, B) pseudo-first-order, and C) pseudo-second-order kinetic models for  $\text{Cd}^{2+}$  ions biosorption on DSC biosorbent.

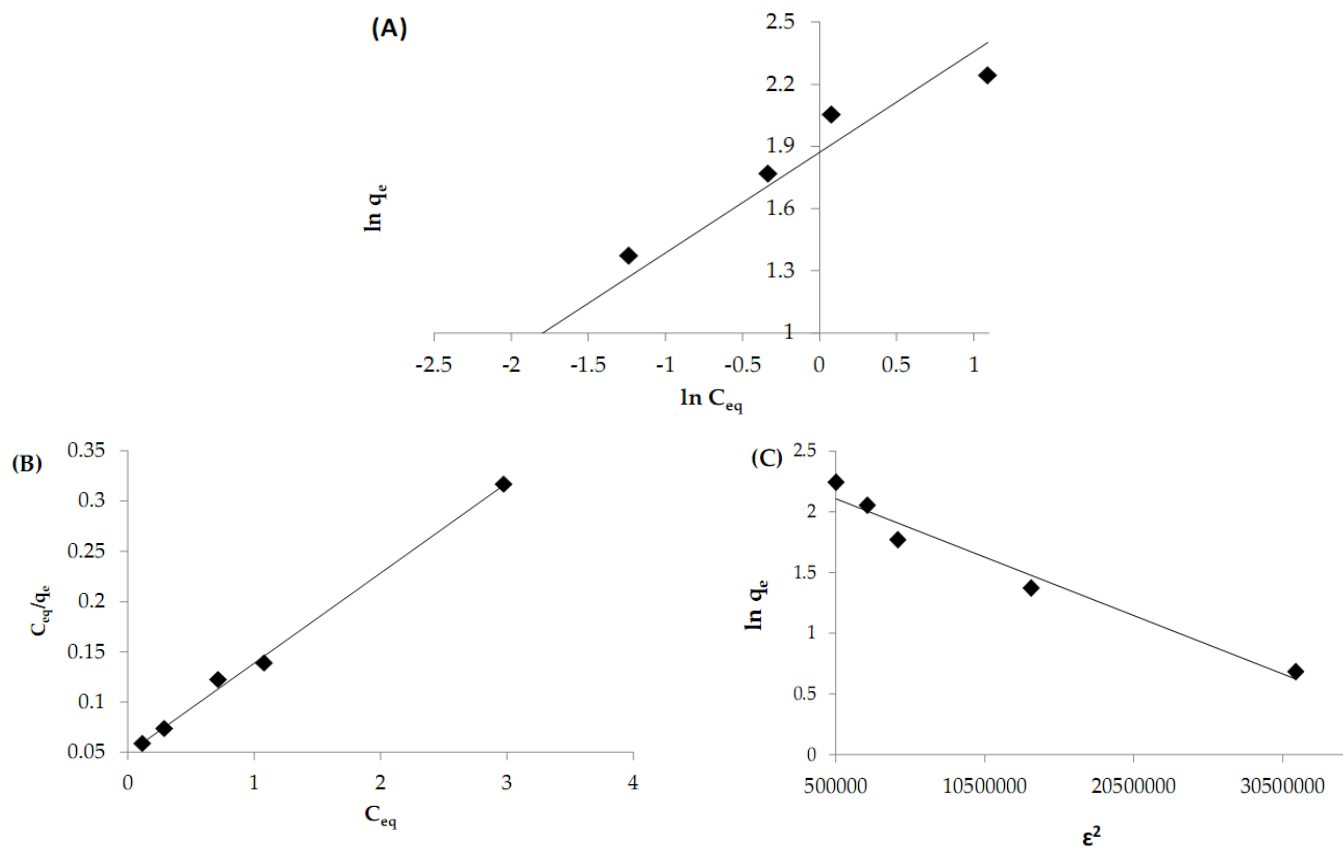

**Figure S2.** Graphs of A) Freundlich, B) Langmuir, and C) D-R adsorption isotherms models for  $\text{Cd}^{2+}$  ions biosorption on DSC biosorbent.

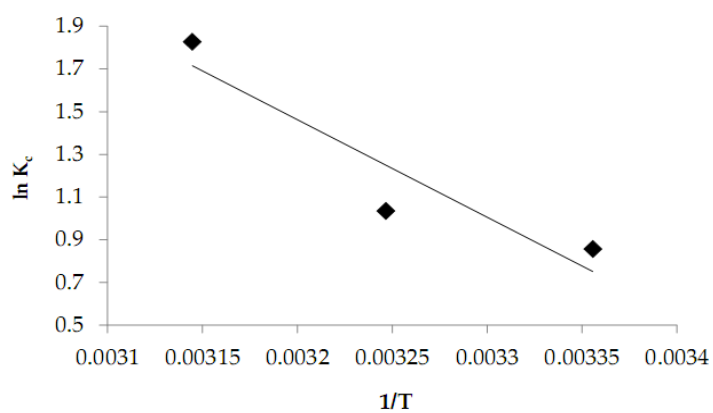

**Figure S3.** Plot of  $\ln K_c$  versus  $1/T$  for  $\text{Cd}^{2+}$  ions biosorption on DSC biosorbent.
